# Supplementary material for: Father’s roles and perspectives on healthcare seeking for children with pneumonia: findings of a qualitative study in a rural community of the Philippines
Source: PubMed Central journal article supplement — BMJ Open. 2018 Nov 21;8(11):e023857. doi: 10.1136/bmjopen-2018-023857 (PMC6252634; doi:10.1136/bmjopen-2018-023857), 2018-11-21
Supplement: bmjopen-2018-023857.draft_revisions.pdf [file bmjopen-2018-023857.draft_revisions.pdf]

# BMJ Open

BMJ Open is committed to open peer review. As part of this commitment we make the peer review history of every article we publish publicly available.

When an article is published we post the peer reviewers' comments and the authors' responses online. We also post the versions of the paper that were used during peer review. These are the versions that the peer review comments apply to.

The versions of the paper that follow are the versions that were submitted during the peer review process. They are not the versions of record or the final published versions. They should not be cited or distributed as the published version of this manuscript.

BMJ Open is an open access journal and the full, final, typeset and author-corrected version of record of the manuscript is available on our site with no access controls, subscription charges or pay-per-view fees (<http://bmjopen.bmj.com>).

If you have any questions on BMJ Open's open peer review process please email [info.bmjopen@bmj.com](mailto:info.bmjopen@bmj.com)

# BMJ Open

## Perspectives and challenges of fathers on seeking care for children with pneumonia: Findings of a qualitative study in a rural community of the Philippines

|                               |                                                                                                                                                                                                                                                                                                                                                                                                                                                                                                                                                                                                                                                                                                                                                                                                                                                                                                                                                                        |
|-------------------------------|------------------------------------------------------------------------------------------------------------------------------------------------------------------------------------------------------------------------------------------------------------------------------------------------------------------------------------------------------------------------------------------------------------------------------------------------------------------------------------------------------------------------------------------------------------------------------------------------------------------------------------------------------------------------------------------------------------------------------------------------------------------------------------------------------------------------------------------------------------------------------------------------------------------------------------------------------------------------|
| Journal:                      | <i>BMJ Open</i>                                                                                                                                                                                                                                                                                                                                                                                                                                                                                                                                                                                                                                                                                                                                                                                                                                                                                                                                                        |
| Manuscript ID                 | bmjopen-2018-023857                                                                                                                                                                                                                                                                                                                                                                                                                                                                                                                                                                                                                                                                                                                                                                                                                                                                                                                                                    |
| Article Type:                 | Research                                                                                                                                                                                                                                                                                                                                                                                                                                                                                                                                                                                                                                                                                                                                                                                                                                                                                                                                                               |
| Date Submitted by the Author: | 27-Apr-2018                                                                                                                                                                                                                                                                                                                                                                                                                                                                                                                                                                                                                                                                                                                                                                                                                                                                                                                                                            |
| Complete List of Authors:     | Sato, Mari; Tohoku University Graduate School of Medicine, Department of Maternal Nursing<br>Oshitani, Hitoshi; Tohoku University Graduate School of Medicine, Virology Department<br>Tamaki, Raita ; Tohoku University Graduate School of Medicine, Virology Department<br>Oyamada, Nobuko; Tohoku University Graduate School of Medicine, Department of Maternal Nursing<br>Sato, Kineko; Tohoku University Graduate School of Medicine, Department of Maternal Nursing<br>Nadra, Alkaff; Tohoku University Graduate School of Medicine, Virology Department<br>Landicho, Jhoys; Research Institute for Tropical Medicine, Department of Epidemiology and Biostatics<br>Alday, Portia; Research Institute for Tropical Medicine, Department of Epidemiology and Biostatics<br>Lupisan, Socorro; Research Institute for Tropical Medicine, Office of Director<br>Tallo, Veronica; Research Institute for Tropical Medicine, Department of Epidemiology and Biostatics |
| Keywords:                     | Health services research, Pneumonia, Qualitative study, Child health                                                                                                                                                                                                                                                                                                                                                                                                                                                                                                                                                                                                                                                                                                                                                                                                                                                                                                   |
|                               |                                                                                                                                                                                                                                                                                                                                                                                                                                                                                                                                                                                                                                                                                                                                                                                                                                                                                                                                                                        |

SCHOLARONE™  
Manuscripts

**FATHERS' PERSPECTIVES ON CHILDHOOD PNEUMONIA****Title: Perspectives and challenges of fathers on seeking care for children with pneumonia: Findings of a qualitative study in a rural community of the Philippines**

Mari Sato<sup>1</sup>, Hitoshi Oshitani<sup>2</sup>, Raita Tamaki<sup>3</sup>, Nobuko Oyamada<sup>1</sup>, Kineko Sato<sup>1</sup>, Alkaff Raihana Nadra<sup>2</sup>,

Jhoys Landicho<sup>4</sup>, Portia P. Alday<sup>4</sup>, Socorro Lupisan<sup>4</sup>, Veronica L. Tallo<sup>4</sup>

<sup>1</sup>Mari Sato

Department of Maternal Nursing, Tohoku University Graduate School of Medicine, Sendai, Japan

<sup>2</sup>Hitoshi Oshitani

Department of Virology, Tohoku University Graduate School of Medicine, Sendai, Japan

<sup>3</sup>Raita Tamaki

Department of Life and Creative Sciences, Nagasaki Women's Junior College, Nagasaki, Japan

<sup>1</sup>Nobuko Oyamada

Department of Maternal Nursing, Tohoku University Graduate School of Medicine, Sendai, Japan

<sup>1</sup>Kineko Sato

Department of Maternal Nursing, Tohoku University Graduate School of Medicine, Sendai, Japan

<sup>2</sup>Alkaff Raihana Nadra

Department of Virology, Tohoku University Graduate School of Medicine, Sendai, Japan

**FATHERS' PERSPECTIVES ON CHILDHOOD PNEUMONIA**

<sup>4</sup>Jhoys Landicho

Department of Epidemiology and Biostatistics, Research Institute for Tropical Medicine, Metro Manila,

Philippines

<sup>4</sup>Portia P. Alday

Department of Epidemiology and Biostatistics, Research Institute for Tropical Medicine, Metro Manila,

Philippines

<sup>4</sup>Socorro Lupisan

Office of Director, Research Institute for Tropical Medicine, Metro Manila, Philippines

<sup>4</sup>Veronica L. Tallo

Department of Epidemiology and Biostatistics, Research Institute for Tropical Medicine, Metro Manila,

Philippines

**Corresponding author:**

Mari Sato:

Postal Address: Department of Maternal Nursing, Tohoku University Graduate School of Medicine, 2-1,

Seiryō-machi, Aoba-ku, Sendai, Japan, #980-8575

E-mail: [mari.sato@med.tohoku.ac.jp](mailto:mari.sato@med.tohoku.ac.jp)

Tel. and Fax: +81-22-717-7957

Key Words: Health services research, Pneumonia, Qualitative study, Child health

**FATHERS' PERSPECTIVES ON CHILDHOOD PNEUMONIA**

Word count: 4,366

Reference count: 51

For peer review only

1  
2  
3  
4  
5  
6  
7  
8  
9  
10  
11  
12  
13  
14  
15  
16  
17  
18  
19  
20  
21  
22  
23  
24  
25  
26  
27  
28  
29  
30  
31  
32  
33  
34  
35  
36  
37  
38  
39  
40  
41  
42  
43  
44  
45  
46  
47  
48  
49  
50  
51  
52  
53  
54  
55  
56  
57  
58  
59  
60

## FATHERS' PERSPECTIVES ON CHILDHOOD PNEUMONIA

### Abstract

**Objectives:** Pneumonia remains a primary cause of death for under-five children. It is possible to reduce the mortality impact from childhood pneumonia if caregivers recognize the danger signs of pneumonia and obtain appropriate health care. Among caregivers, research on fathers' roles, perspectives and experiences are limited, whereas research on mothers is available. This study aims to reveal fathers' actions and perspectives with respect to the selection of care and treatment for children with pneumonia in a remote island of the Philippines.

**Design:** A qualitative research was carried out using semi-structured interviews.

**Setting and Participants:** The interview was conducted for twelve fathers whose children had pneumonia-like episodes within six months prior to the interview. The interviews were conducted in November 2016. Data analysis was done using the concept analysis method to identify codes, which were merged into subcategories and categories. Finally, the core categories were identified.

**Results:** Three core categories were identified as part of fathers' role, and two were identified as fathers' experiences and perspectives on various treatment options. Fathers took care of their sick children not entrusting care only to mothers because they considered this as part of their role. Notably, fathers considered that arranging money for the child's treatment was a matter of prime importance. They selected a particular treatment based on their experiences and beliefs, including herbal medicine, home treatment, going to traditional healers and health facilities. Their decision was influenced by not only their

**FATHERS' PERSPECTIVES ON CHILDHOOD PNEUMONIA**

1  
2  
3  
4 perception of the severity of illness but also the cultural beliefs on the cause of illness. Visiting health  
5  
6  
7 facilities, particularly hospital admission, causes significant financial burden for the family, and this was  
8  
9  
10 the main concern of fathers.

11  
12  
13 **Conclusion:** It is crucial to address the issues associated with the medical cost and the credibility of  
14  
15  
16 health facilities to improve fathers' health seeking behaviour.  
17  
18  
19  
20  
21  
22  
23  
24  
25  
26  
27  
28  
29  
30  
31  
32  
33  
34  
35  
36  
37  
38  
39  
40  
41  
42  
43  
44  
45  
46  
47  
48  
49  
50  
51  
52  
53  
54  
55  
56  
57

## FATHERS' PERSPECTIVES ON CHILDHOOD PNEUMONIA

### Strengths and limitations of this study

- ♦ The study focused on the fathers' role, perspectives and experience whose children had pneumonia like episode. Most of previous studies focused on mothers and studies on fathers' roles, perspectives and experiences are limited.
- ♦ The study derived the recommendation to strengthen the father's health seeking behaviour and to implement health education programs for fathers to increase their awareness and proper knowledge of pneumonia.
- ♦ One of the limitations of the study is that this study was conducted in just one rural municipality of the Philippines which is located in a remote island, and the interviews were conducted with only 12 fathers which may not be generalized to the whole country.



## FATHERS' PERSPECTIVES ON CHILDHOOD PNEUMONIA

### BACKGROUND

Although the under-five mortality rate has significantly reduced in the past decades, it is still estimated that 5.9 million children died in 2015 worldwide.<sup>1</sup> Most of these deaths occur in low- and middle-income countries due to preventable or treatable infectious diseases with proven and cost effective interventions such as pneumonia, diarrhoea, and malaria.<sup>1</sup>

The Philippines is a lower middle-income country located in Southeast Asia.<sup>2</sup> Although the under-five mortality rate dropped from 59 per 1,000 in 1990 to 29 per 1,000 in 2010,<sup>3</sup> pneumonia remains the leading cause of death for children aged 1-4 years.<sup>4</sup> The Philippines promotes the integrated management of childhood illness (IMCI) approach, which aims to reduce death, illness, and disability from common childhood diseases including pneumonia. IMCI has both preventive and curative elements.<sup>5</sup> Effective antibiotics for bacterial pneumonia are available in most health facilities in even low- and middle-income countries such as the Philippines. Therefore, early recognition of danger signs of pneumonia by caregivers and appropriate health care seeking can prevent deaths from childhood pneumonia.<sup>6-8</sup> However, only half of the children with pneumonia in the Philippines have received treatment from appropriate providers.<sup>4</sup>

Most previous studies have analysed health care seeking behaviours and perceptions of mothers for childhood pneumonia.<sup>9-14</sup> Mothers had poor knowledge of aetiology and danger signs of pneumonia.<sup>10</sup>

## FATHERS' PERSPECTIVES ON CHILDHOOD PNEUMONIA

1  
2  
3  
4 <sup>13</sup>They often self-medicate children with antibiotics and traditional medicines<sup>15-17</sup> and take them to a  
5  
6  
7 traditional healer,<sup>18 19</sup> which may result in a delay of appropriate treatment. Factors associated with health  
8  
9  
10 seeking behaviours include caregivers' age, health care cost, distance to health facilities, knowledge of  
11  
12  
13 danger signs, and children's age. <sup>14 20 21</sup>Moreover, father's educational status had a significant effect on  
14  
15  
16 mother's health care seeking behaviour.<sup>14</sup> Previous research showed although mothers generally play an  
17  
18  
19 important role as the primary caregiver for a sick child, fathers' opinion affects the decision of health care  
20  
21  
22 seeking.<sup>16</sup> However, fathers' perspectives, knowledge, and role in health care seeking remain largely  
23  
24  
25 unknown.

26  
27  
28 This study was conducted to reveal fathers' actions and perspectives on the selection of care and  
29  
30  
31 treatment for childhood pneumonia in a remote island of the Philippines. We used a qualitative content  
32  
33  
34 analysis approach, which is suitable for analysing common issues mentioned in describing data,<sup>22</sup>  
35  
36  
37 interpreting meaning from the content of text data,<sup>23</sup> and systematically categorising and summarising  
38  
39  
40 large volumes of data.<sup>24</sup> Qualitative content analysis is mainly inductive, and the analysis is not based on  
41  
42  
43 previous theories or hypotheses.<sup>23 24</sup> We believe that this analytical approach is appropriate to extract  
44  
45  
46 categories of meaningful statements.

## MATERIAL AND METHODS

### Study design

51  
52  
53  
54  
55 This study employed a qualitative investigation method using individual interviews.  
56  
57

## FATHERS' PERSPECTIVES ON CHILDHOOD PNEUMONIA

### Study area

The study was conducted in the Caibiran municipality of Biliran province in the Eastern Visayas Region of the Philippines (Figure 1). Biliran province has 172,000 inhabitants and consists of one main island (Biliran Island) and other small islands. The province has eight municipalities, and Caibiran is one of them with a population of around 22,500.<sup>25</sup> Tohoku University Graduate School of Medicine in Japan and the Research Institute for Tropical Medicine (RITM) in the Philippines conducted a joint research project entitled 'Comprehensive Etiological and Epidemiological Study on Acute Respiratory Infections in Children' from 2011 to 2017. The main objective of this project was to provide evidence to reduce the impact of paediatric acute respiratory infections including pneumonia. The project's main component was a cohort study conducted in Biliran Island, including Caibiran municipality, with children under five years of age. Therefore, we selected Caibiran as our study site.

The Philippines has public sector primary health facilities and hospitals. Barangay Health Stations (BHS) and Rural Health Units (RHU) provide primary health services. BHS provides pre-natal and post-natal care, immunization, health education, and limited clinical consultation with one assigned midwife and several barangay health workers (health volunteers). RHU provides out-patient care, delivery, and the same activities as BHS with one qualified doctor and several nurses and midwives. Each province usually has one provincial hospital and some district hospitals.<sup>26</sup> Caibiran has one RHU and six BHS. Biliran Provincial Hospital (BPH), a secondary level referral hospital, the only hospital in Biliran

## FATHERS' PERSPECTIVES ON CHILDHOOD PNEUMONIA

Province, is located in Naval, the capital of Biliran Province, around 30 km away from Caibiran.

### Participants

Participants of this study were fathers whose children were registered in the childhood pneumonia study, in which children under five years of age were studied to define incidence, aetiology, and risk factors for pneumonia. Caregivers of children in the intervention study were requested to record symptoms of acute respiratory infections such as a cough, difficulty breathing, and chest indrawing. We checked all registered records and identified children who had pneumonia-like episodes (a cough or difficulty breathing, plus chest indrawing) within six months prior to the interview. Finally, twelve fathers were selected as participants.

### Patient and Public Involvement

Patients were not involved to the development of the research question, the design of this study, recruitment and conducting study, and the study dissemination.

### Data collection

The individual interviews were conducted from 18 to 22 November 2016 using semi-structured interview questionnaires. The questions sought information on fathers' perception of pneumonia, their behaviour and actions for care and treatment, and roles and responsibilities when children had pneumonia-like episodes. Prior to asking the main questions, we also asked some questions to obtain demographic information and necessary data to assess the socio-economic status (SES) of the household.

## FATHERS' PERSPECTIVES ON CHILDHOOD PNEUMONIA

We used a simple poverty scorecard to assess the household SES using 10 simple questions.<sup>27 28</sup> The maximum total score was 100 and the minimum was 0, with a lower score indicating a lower SES. Each interview lasted 22–54 minutes (average = 32.9 minutes). Interviews were conducted in English by a researcher, and three interpreters translated the questions and answers from English to the local language, and vice versa. The interpreters were nurses and were fluent in the Waray-Waray language (the main local language of Caibiran Municipality) and English. Prior to conducting the interviews, a researcher trained the three interpreters in the research objectives, contents, and interview procedure. All interviews were conducted by a team of three members including the main interviewer (using English), the main interpreter (translating English into Waray-Waray and vice versa), and an assistant interpreter (supporting the main interpreter and recording the interview). All interviews were recorded.

### Data analysis

The interviews were transcribed in Waray-Waray, and the transcription was translated into English by an interpreter. The English translation was back-translated into Waray-Waray for verifying the accuracy. English transcribed interviews were checked several times to eliminate ambiguities. One researcher then selected the meaningful units from the transcript according to the study objectives, and these units were refined and assigned codes. Selected codes were verified by other researchers if the code reflected the meaning of each unit. After identifying all codes, the researchers grouped the codes into subcategories based on similarities and differences. These subcategories were eventually combined into

## FATHERS' PERSPECTIVES ON CHILDHOOD PNEUMONIA

main categories.<sup>23 24</sup> Finally, the core categories were identified as factors affecting fathers' health seeking behaviours. During the analysis, the researchers engaged in extensive discussions until consensus was reached on codes, subcategories, main categories, and core categories.

### **Ethical approval**

The study conformed to the Helsinki Declaration. All fathers who participated in interviews were informed about the study, associated risks, and benefits, and voluntary participation was obtained verbally and in writing. Interviews were conducted only after obtaining the fathers' written informed consent. The study protocol was approved by the Ethics Committee of Tohoku University Graduate School of Medicine (No. 2014-1-790) and the Institutional Review Board of RITM in the Philippines (No. 2016-25).

### **RESULTS**

Participant demographics are provided in Table 1. All participants had a job. Five had not completed elementary school education, and four had education levels above high school. Except for one participant, all others had two to seven children, with a mean of 3.2. Eight had experienced admitting at least one of their children in a hospital in the past. The range of the SES card was from 14 to 57, with a mean of 25.5. Out of the 12 households, scores of 8 households were less than 31, which is the national poverty threshold, meaning the minimum level of income in the Philippines.<sup>27 28</sup> Among children who had a pneumonia-like episode, three were female and nine were male, and four children were under one

**FATHERS' PERSPECTIVES ON CHILDHOOD PNEUMONIA**

1  
2  
3  
4  
5  
6  
7  
8  
9  
10  
11  
12  
13  
14  
15  
16  
17  
18  
19  
20  
21  
22  
23  
24  
25  
26  
27  
28  
29  
30  
31  
32  
33  
34  
35  
36  
37  
38  
39  
40  
41  
42  
43  
44  
45  
46  
47  
48  
49  
50  
51  
52  
53  
54  
55  
56  
57  
58  
59  
60

year of age.

For peer review only

**FATHERS' PERSPECTIVES ON CHILDHOOD PNEUMONIA**

Table 1: Demographics and other characteristics of fathers whose children had a pneumonia-like episode in Biliran island, the Philippines.

For peer review only



## FATHERS' PERSPECTIVES ON CHILDHOOD PNEUMONIA

### Father's role

Three core categories were identified in relation to fathers' role in caring for a sick child: belief in their own judgment, arranging money, and responsibility as a leader of the family (Table 2). Brief transcripts of the fathers' interviews are shown as examples, which are indicated in italics with the father's identity number (F1-F12).

Table 2: Core Categories and categories of father's role identified from the in-depth interview of fathers whose children had pneumonia-like episodes in Biliran island, the Philippines

| Core Categories                          | Categories                                                          |
|------------------------------------------|---------------------------------------------------------------------|
| Belief in their own judgment             | Father observes and cares a sick child at home for a few days       |
|                                          | Father has limited knowledge about pneumonia                        |
| Arranging money                          | Father works and saves money for child's treatment                  |
|                                          | Money issue comes first to father's mind when child is hospitalized |
| Responsibility as a leader of the family | Father intends to take responsibility for a child                   |
|                                          | Father assists a mother who has a key role of caring a sick child   |

### Belief in their own judgment

Five fathers mentioned that they checked and treated a child at home when he/she had a cough and fever for a few days instead of immediately taking the child to a health facility. Fathers checked for fever by touching the child's forehead and observed other symptoms such as nonstop crying, restlessness, and loss of appetite. Seven fathers knew that applying cold water reduced fever: *'We know how to give*

**FATHERS' PERSPECTIVES ON CHILDHOOD PNEUMONIA**

1  
2  
3  
4 *first aid. If my child has fever, we wipe him with a wet towel to lower his temperature (F10)*'. One father  
5  
6  
7 cuddled his child to make him/her feel better, and another cleaned their surroundings.  
8  
9

10 Fathers thought that a sick child needed nutritious foods, such as fruits, vegetables, eggs, and fish,  
11  
12 and easy-to-digest foods such as porridge. One father recognized the importance of giving an adequate  
13  
14 amount of water. Some fathers bought biscuits or soft drinks, which they usually could not afford, and  
15  
16 one father gave what his own mother used to give him when he was sick in early childhood: *'If I have*  
17  
18 *money, I buy eggs for my sick child. If I don't, I just buy royal (soft drink), because that was what my*  
19  
20 *mother used to give me (F6)*'.  
21  
22  
23  
24  
25  
26  
27

28 Ten fathers had heard of pneumonia. One of them whose family member had been diagnosed  
29  
30 with pneumonia remembered details such as symptoms and treatment. Two fathers had never heard of  
31  
32 pneumonia. Their recognition of pneumonia symptoms varied, covering cough, asthma, weakness,  
33  
34 irritability, fever, difficulty in breathing, crackling sound in the chest, and convulsion: *'She had a hard*  
35  
36 *cough, she had difficulty breathing, a crackling sound could be heard when she would breathe. That's*  
37  
38 *what I observed in my child (F2)*'.  
39  
40  
41  
42  
43  
44  
45

**Arranging money**

46  
47  
48  
49 Fathers thought that it is their responsibility to earn money for their family needs, including  
50  
51 money necessary to treat and to prepare for their child's illness. One father who had lost his first child  
52  
53 saved money whenever he had extra income: *'We usually save even 50 pesos if we make extra, because*  
54  
55  
56  
57

**FATHERS' PERSPECTIVES ON CHILDHOOD PNEUMONIA**

1  
2  
3  
4 *we do not know when the child may need to go to a hospital again (F4)*’.

5  
6  
7       When hospitalization was required, fathers first thought of money. Most fathers have struggled  
8  
9  
10 with money issues, such as from whom to borrow and how to repay the loan. Most of them borrowed  
11  
12 money from their relatives and friends. Some fathers asked for financial help from politicians for their  
13  
14 children’s hospital expenses. Some of them were still repaying debt: *‘I felt different. I was afraid. I was*  
15  
16 *worried because I did not have any money. I looked for money and asked for it from my neighbours (F1)*’.

**Responsibility as a leader of the family**

17  
18  
19  
20  
21  
22  
23  
24  
25       Fathers considered themselves the leader of the family who solves any problem that occurs in the  
26  
27 family. They took various actions to improve their sick child’s health, such as seeking information from  
28  
29 other people: *‘I look after my children, wipe them if they were sweating, and I ask other people about*  
30  
31 *what to do (F6)*’. Fathers were also the main decision makers regarding which facility to use. Although  
32  
33 fathers discussed such matters with mothers, they were proud to be the primary decision maker: *‘If I see*  
34  
35 *that my child is unwell, I bring him to RHU. I talk to my wife, but I am the one who decides (F6)*’.

36  
37  
38  
39  
40  
41  
42  
43       Although fathers helped care for their sick children, mothers were the main caregivers. Three  
44  
45 fathers had never accompanied a child to RHU, and two fathers had only dropped the mother and child in  
46  
47 front of the RHU. Fathers assisted mothers in caring for a sick child: *‘I give my wife some ice. I waited for*  
48  
49 *the ice to melt and then wiped the child (F9)*’.

50  
51  
52  
53  
54  
55 Father’s experiences of and perspectives on various treatment options (Table 3)

## FATHERS' PERSPECTIVES ON CHILDHOOD PNEUMONIA

Two core categories were identified in relation to fathers' experiences and perspectives on various treatment options: fathers' way of taking care of their sick children and fathers' preference of health facilities (Table 3).

Table 3: Core Categories and categories of father's experience and perspectives identified from the in-depth interview of fathers whose children had pneumonia-like episodes in Biliran Island, the Philippines

| Core Categories                                    | Categories                                                                         |
|----------------------------------------------------|------------------------------------------------------------------------------------|
| Fathers' way of taking care of their sick children | Herbal medicines are easy to prepare at home                                       |
|                                                    | Some fathers keep a stock of medicines at home                                     |
|                                                    | Father has limited knowledge about medication                                      |
| Fathers' preference of health facilities           | Father takes a child to a traditional healer because of their therapeutic efficacy |
|                                                    | Father generally does not prefer BHS                                               |
|                                                    | Father takes a child to RHU for having a medical consultation                      |
|                                                    | Father expects receiving medicines for a sick child from RHU                       |
|                                                    | Father prefers to be seen by a staff with medical expertise                        |
|                                                    | Father relies on health staff advice to refer a child to a hospital                |

### Fathers' way of taking care of their sick children

Fathers procured herbal medicines for a cough from a garden or from neighbours. Most fathers thought that oregano and five-leaved chaste tree leaves were effective for a cough and asked mothers to make herbal medicines for the child with a cough. Fathers had their own methods for preparing herbal medicine: just boiling the leaves in water, crushing the leaves, or steaming the leaves and squeezing the

**FATHERS' PERSPECTIVES ON CHILDHOOD PNEUMONIA**

juice. Three fathers added lemon and sugar or milk to the medicine for taste. Three fathers recognized that herbal medicines could have limited effectiveness, and two fathers avoided using them: *'We used oregano because it is easy to use. A cough was relieved by the herbal medicine but relapsed after getting better once (F12)'*. Two fathers had never used herbal medicines.

Fathers used two kinds of stock medicines for their children: antibiotics for a cough and antipyretics for fever. Three fathers did not have any stock medicines at home. Some of them bought medicines without prescription at a pharmacy, and some asked neighbours and relatives to give them medicines: *'I asked my mother-in-law for medicine since she had a stock of medicines from the congressman (F9)'*. Although fathers used Western medicines such as antibiotics, they did not know their names or dosage. Mothers handled these aspects. One father had no idea what antibiotics were: *'We gave the child paracetamol liquid, but I do not know the dosage. I don't have any idea what antibiotics are. What is that? I think it is cephalexin (F8)'*.

Taking a sick child to a traditional healer was a common choice of fathers. Most fathers brought their children to RHU after a traditional healer failed to treat the child. One father used both RHU and a traditional healer on the same day, another father took his child to a traditional healer when the child did not recover after going to RHU, and the others took their children to a traditional healer after providing them with home treatment: *'If my child has fever, we bring him to the traditional healer. In a few days, he gets better (F6)'*.

**FATHERS' PERSPECTIVES ON CHILDHOOD PNEUMONIA**

Fathers believed that suffering from a sprain, fracture, or some other pain made the child sick with fever, cough, or vomiting: *'Sometimes when the child had fever, people said the child had piang. Sometimes when the child experienced body pain, the child had fever (F5)'*. Piang refers to a sprain or dislocation of tissues or bones in the chest or back, resulting in symptoms such as fever and cough.[29] A traditional healer generally checks nerves, puts liniment, and gives the child a massage while chanting rituals. Fathers believed a traditional healer's treatment to be effective as they had seen their child recover after receiving treatment from a traditional healer: *'When my child was treated by a traditional healer, he seemed at ease. I was free from worry (F12)'*. Traditional healers charge a small amount of money and do not have a fixed fee. One father did not like to go to a traditional healer as he thought it risky: *'I don't like traditional healers. I cannot take a risk when it comes to my child. I prefer to bring him to RHU first. I don't like to take him to a traditional healer (F2)'*.

**Fathers' preference of health facilities**

Fathers generally did not prefer to take their child to BHS. They preferred taking the child directly to RHU without using BHS, because the latter has insufficient equipment, and fathers perceive that it is closed all the time. Two fathers noted that BHS staff always referred a child either to an RHU or to a hospital.

Fathers preferred RHU because of the short distance and availability of medicines. RHU provides medicines for free if they have a stock. However, when there was no stock of medicines at RHU, they had

**FATHERS' PERSPECTIVES ON CHILDHOOD PNEUMONIA**

1  
2  
3  
4 to buy medicines themselves: *'When my child's condition became worse with a cough with sputum, we*  
5  
6  
7 *brought him to RHU. But they did not have stock medications. I paid 105 pesos for amoxicillin (F6)'*.

8  
9  
10 Some of them could not afford to buy medicines because they did not have enough money: *'RHU staff*  
11  
12  
13 *gave me a prescription. But I could not buy the medicines as I did not have enough money (F2)'*.

14  
15  
16 Fathers thought that RHU staff knew diseases well and knew how to cure the child. Some fathers  
17  
18  
19 had witnessed RHU staff listening to the child's chest sound, fanning a child to cool fever down, and  
20  
21  
22 using oxygen or nebulizer when a child had difficulty breathing: *'RHU staff used a fan for my child to*  
23  
24  
25 *relieve fever. Only in the case that he suffers from difficulty in breathing, they use something like oxygen*  
26  
27  
28 *and nebulizer. It heated and made steam (F10)'*.

29  
30  
31 Fathers took their children to RHU to be checked, particularly by a doctor: *'I think that only a*  
32  
33  
34 *doctor knows what kind of medicines my child needs, and we are not convinced unless a doctor checks my*  
35  
36  
37 *child (F1)'*. However, they recognized that a doctor was not always available and that only some nurses  
38  
39  
40 and midwives might be available at RHU. Nurses at RHU sometimes referred a child to a hospital when  
41  
42  
43 they could not handle the situation themselves: *'Once, a nurse prescribed antibiotics for a cough when I*  
44  
45  
46 *brought my child to RHU. I argued with her because she was not a doctor (F11)'*.

47  
48  
49 Eight fathers had past experiences of having admitted their children to a hospital for different  
50  
51  
52 reasons and the treatment leading to recovery. Some fathers took their children to a hospital if his/her  
53  
54  
55 condition became serious. Fathers complied with the doctor's recommendation to go to a hospital. One  
56  
57

## FATHERS' PERSPECTIVES ON CHILDHOOD PNEUMONIA

1  
2  
3  
4 father did not comply with such a recommendation when he did not have any money: *'If it is an*  
5  
6  
7 *emergency, surely, I bring my child to a hospital. The important thing is for my child to be okay (F2)'*.  
8  
9

## DISCUSSION

10  
11  
12  
13 The study revealed that fathers monitored a sick child at home by assessing the child's symptoms  
14  
15  
16 and providing some care, since they considered these as part of their role as fathers. Though mothers are  
17  
18  
19 the main caregivers,<sup>11-14</sup> fathers did not entrust the care of their sick children solely to mothers. Fathers  
20  
21  
22 also play an important role in arranging money for treatment.<sup>29</sup> They recognized this as their  
23  
24  
25 responsibility and attempted to fulfil it. In this study, it was found that paying incidental costs, such as  
26  
27  
28 those for medicine, poses a significant problem for fathers when RHU or a hospital cannot provide free  
29  
30  
31 medicines for a child. Our study participants were generally poor, and our previous study conducted in  
32  
33  
34 Biliran Island indicated that low SES score was associated with incidence of a pneumonia-like episode.<sup>30</sup>  
35  
36  
37 Moreover, there was a positive correlation between SES and the proportion of appropriate health care  
38  
39  
40 seeking behaviours in the study in Ethiopia.<sup>31</sup> Although Philippines has a health insurance scheme called  
41  
42  
43 the Philippine Health Insurance Corporation (PhilHealth)<sup>32</sup> that covers around 79 percent of the  
44  
45  
46 population to improve universal health coverage, PhilHealth does not cover full costs of treatment,<sup>33</sup> such  
47  
48  
49 as the out-of-pocket cost for medication when health facilities do not have a stock of medicines. A high  
50  
51  
52 level of out-of-pocket payments influences the utilization rates of public health care.<sup>34</sup> As most  
53  
54  
55 participants had difficulties in paying the treatment cost for hospitalization, this may be a primary barrier  
56  
57



**FATHERS' PERSPECTIVES ON CHILDHOOD PNEUMONIA**

for appropriate health seeking, particularly taking children to the hospital for admission.

Herbal medicines were also commonly used by our study participants. The Philippines government promotes the use of some herbal medicines that are cheap and readily available.<sup>35 36</sup> Fathers also used antipyretic for fever, and antibiotics and herbal medicines for a cough at home. A previous study in the Philippines revealed that 43 percent of caregivers bought medications without a prescription and that they engaged in home treatment to save time and money.<sup>37</sup> The use of drugs without a prescription, particularly antibiotics, is of concern. Home treatment is risky due to low effectiveness and potential side effects, including the emergence of antimicrobial resistance.<sup>38</sup> However, caregivers are usually not aware of side-effects and drug efficacy.<sup>39</sup> Additionally, a gap may exist between illness recognition to seeking outside care because of waiting for a drug course to complete, which can result in a major delay in getting appropriate treatment.<sup>17 40</sup> Previous studies have shown that home treatment is associated with a delay in seeking appropriate treatment.<sup>9 13</sup> It is not practical to bring all children with acute respiratory infections to health facilities since these symptoms are very common among children and the majority are self-limited. However, caregivers including fathers should recognize the danger signs of pneumonia, which require urgent medical attention.

Fathers play an important role in deciding the care or treatment that is provided at home or health facilities. A previous study indicated that most mothers decided to seek assistance from outside home after discussing with their husbands,<sup>41</sup> and some studies showed that fathers play the role of the primary

**FATHERS' PERSPECTIVES ON CHILDHOOD PNEUMONIA**

1  
2  
3  
4 decision maker regarding their children's health seeking.<sup>29 42-44</sup> Three key steps were shown to prevent  
5  
6 pneumonia deaths of children aged under five: recognizing that a child is sick, seeking appropriate care,  
7  
8 and treating appropriately with antibiotics.<sup>6</sup> In our study, fathers did not have a clear understanding of  
9  
10 pneumonia symptoms and danger signs of sick children. Mothers know the disease named pneumonia but  
11  
12 have poor knowledge of the aetiology and danger signs of probable pneumonia.<sup>10 12</sup> It is usually difficult  
13  
14 to recognize the seriousness of certain acute respiratory infections such as pneumonia.<sup>7</sup> The positive  
15  
16 predictive value of caregiver diagnosis of pneumonia and knowledge of pneumonia was lower than that of  
17  
18 those of diarrhoea and malaria.<sup>21 45</sup> The lack of recognition of signs of severe illness by caregivers is the  
19  
20 most commonly cited reason for not seeking appropriate health care.<sup>46</sup> Caregivers with lower education  
21  
22 level are more likely to use home treatment and/or traditional healers as the first action,<sup>10</sup> and they should  
23  
24 therefore be provided with necessary knowledge about pneumonia.<sup>6, 47</sup> Generally, health education  
25  
26 programs in the community target mothers and fathers who have lesser opportunities to expand their  
27  
28 knowledge. Considering their important role in the decision-making process, it is necessary to offer health  
29  
30 education programs to increase fathers' knowledge and to improve the health care system, which can be  
31  
32 trusted by fathers.<sup>48 49</sup>

33  
34  
35  
36  
37  
38  
39  
40  
41  
42  
43  
44  
45  
46  
47  
48  
49  
50  
51  
52  
53  
54  
55  
56  
57  
58  
59  
60  
Fathers were found to take their own decisions in selecting facilities for treatment. Fathers took  
their children to a traditional healer when they thought that the child had 'piang' (sprain) before going to  
RHU. When they believed that the child had an accident or sprain, they tended to prefer a traditional

**FATHERS' PERSPECTIVES ON CHILDHOOD PNEUMONIA**

1  
2  
3  
4 healer. In the Philippines, people often consider a cough and fever to be caused by 'piang'. Illness in the  
5  
6  
7 'piang' complex can be traced back to the child falling down or being handled incorrectly by their  
8  
9  
10 mothers or elder siblings, and they believe that only a traditional healer could treat this condition.<sup>50</sup> Such  
11  
12  
13 local belief might be a hidden barrier for inappropriate health seeking behaviour and could lead to delay  
14  
15  
16 in consulting appropriate health facilities.<sup>50</sup> Since cultural and social beliefs about the causation and  
17  
18  
19 treatment of illness cannot be ignored, it is crucial to understand them to promote appropriate health  
20  
21  
22 seeking behaviours. Furthermore, fathers prefer to use a traditional healer because of the mode of  
23  
24  
25 payment. The mechanism of paying a traditional healer is more flexible and affordable for them.<sup>13, 16</sup>  
26  
27  
28 Some fathers in our study were disappointed with the absence of doctors in RHU. Health services should  
29  
30  
31 also be more friendly toward fathers, that is, they should be made parent-friendly instead of only mother-  
32  
33  
34 friendly.<sup>51</sup> In over 90 percent of cases, one reason for eventually visiting health facilities was the  
35  
36  
37 worsening of the child's condition.<sup>13</sup> If health facilities become more reliable by ensuring continuous  
38  
39  
40 presence of health care staff, particularly doctors, and constant availability of free medication, then  
41  
42  
43 caregivers may prefer to directly take their children to health facilities such as RHU.  
44  
45

46 This study, however, has some limitations. We were unable to distinguish fathers whose children  
47  
48  
49 had been taken to RHU from those whose children had not been taken because of the uncertainty of health  
50  
51  
52 records. Second, this study was conducted in just one rural municipality of the Philippines which is  
53  
54  
55 located in a remote island, and the interviews were conducted with only 12 fathers. Therefore, our  
56  
57

## FATHERS' PERSPECTIVES ON CHILDHOOD PNEUMONIA

findings may not be generalized to the whole country. Third, the study was conducted in two languages, English and the local language. Although we made every effort to ensure an accurate interpretation, the possibility of inaccurate interpretation and/or translation cannot be entirely eliminated. However, we believe that this study provides some important insights into fathers' perceptions and health care seeking behaviour related to childhood pneumonia. Further studies should include other settings, utilize both qualitative and quantitative methods to analyse health seeking patterns, and conduct a comparison of the roles of mothers and fathers.

## CONCLUSION

Fathers in our study tended to take responsibility for caring for their sick children and made treatment decisions when their children had pneumonia-like episodes. They usually waited and observed their sick children at home or relied on traditional healers before using formal health facilities. Arranging money for the treatment of their sick children was their major role. Regarding their role of deciding the treatment options, it is necessary to improve their knowledge on childhood pneumonia so that they can have appropriate health seeking behaviour. Therefore, it is necessary to implement health education programs for fathers to increase their awareness and knowledge of pneumonia. To implement such programs, it is crucial to consider cultural background such as local beliefs. It is also imperative to address issues related to medical cost and the credibility of health facilities to improve fathers' health seeking behaviour.

**FATHERS' PERSPECTIVES ON CHILDHOOD PNEUMONIA****Acknowledgements**

The authors would like to acknowledge and thank the participants who generously shared their time and experiences with us and the supporting staff who assisted as interpreters.

**Contributorship statement**

MS, ARN, and HO were involved in the conception and design of the study. MS and RT carried out the acquisition of data. MS, NO, KS, and HO conducted data analysis and interpretation. JL, PPA, SL, and RT provided background information on the study site. VLT critically revised it for important cultural and intellectual content. All authors read and approved the final manuscript.

**Funding**

This study was carried out with financial support from The Konosuke Matsushita Memorial Foundation, JSPS KAKENHI Grant Number17K09189, Science and Technology Research Partnership for Sustainable Development (SATREPS) from Japan Agency for Medical Research and Development (AMED) and Japan International Cooperation Agency (JICA) under Grant Number JP16jm0110001, and Tohoku University Center for Gender Equality Promotion. The founder had no role in study design, data collection and analysis, decision to publish, or preparation of the manuscript.

**Competing interests**

None declared.

## FATHERS' PERSPECTIVES ON CHILDHOOD PNEUMONIA

### Patient consent

Not required.

### Ethics approval

The Ethics Committee of Tohoku University Graduate School of Medicine (No. 2014-1-790) and the Institutional Review Board of RITM in the Philippines (No. 2016-25) approved this study.

### Data sharing statement

Anonymised interview transcripts can be available from the corresponding author on reasonable request.

### Provenance and peer review

Not commissioned; externally peer reviewed.

1. You D, Hug L, Ejdemyr S, et al. Global, regional, and national levels and trends in under-5 mortality between 1990 and 2015, with scenario-based projections to 2030: a systematic analysis by the UN Inter-agency Group for Child Mortality Estimation. *Lancet* 2015;386:2275-86.
2. World Bank. *Data World Bank country and lending groups*.  
<https://datahelpdesk.worldbank.org/knowledgebase/articles/906519-world-bank-country-and-lending-groups> (cited 20 Dec 2017).
3. The United Nations Children's Fund (UNICEF). *Maternal and newborn health country profiles*

## FATHERS' PERSPECTIVES ON CHILDHOOD PNEUMONIA

1  
2  
3  
4 *the Philippines*. [https://www.unicef.org/philippines/MNH\\_Philippines\\_Country\\_Profile.pdf](https://www.unicef.org/philippines/MNH_Philippines_Country_Profile.pdf) (cited 20 Dec  
5  
6  
7 2017).

8  
9  
10 4. Department of Health, Republic of the Philippines. *Leading causes of child mortality*.  
11  
12  
13 <http://www.doh.gov.ph/node/1488> (cited 20 Dec 2017).

14  
15  
16 5. World Health Organization. *Towards a grand convergence for child survival and health: a*  
17  
18  
19 *strategic review of options for the future building on lessons learnt from IMNCI Nov.2016*  
20  
21  
22 <http://apps.who.int/iris/bitstream/10665/251855/1/WHO-MCA-16.04-eng.pdf?ua=1> (cited 20 Dec 2017).

23  
24  
25 6. The United Nations Children's Fund (UNICEF) / World Health Organization. *Pneumonia: the*  
26  
27  
28 *forgotten killer of children 2006*. [http://apps.who.int/iris/bitstream/10665/43640/1/9280640489\\_eng.pdf](http://apps.who.int/iris/bitstream/10665/43640/1/9280640489_eng.pdf)  
29  
30  
31 (cited 20 Dec 2017).

32  
33  
34 7. Scott JA, Wonodi C, Moisi JC, et al. The definition of pneumonia, the assessment of severity,  
35  
36  
37 and clinical standardization in the pneumonia etiology research for child health study. *Clin Infect Dis*  
38  
39  
40 2012;54:109-16.

41  
42  
43 8. World Health Organization. *Integrated management of childhood illness Chart Booklet. 2014*.  
44  
45  
46 [http://apps.who.int/iris/bitstream/10665/104772/16/9789241506823\\_Chartbook\\_eng.pdf?ua=1](http://apps.who.int/iris/bitstream/10665/104772/16/9789241506823_Chartbook_eng.pdf?ua=1) (cited 20  
47  
48  
49 Dec 2017).

50  
51  
52 9. Diaz T, George AS, Rao SR, et al. Healthcare seeking for diarrhoea, malaria and pneumonia  
53  
54  
55 among children in four poor rural districts in Sierra Leone in the context of free health care: results of a  
56  
57

## FATHERS' PERSPECTIVES ON CHILDHOOD PNEUMONIA

cross-sectional survey. *BMC Public Health* 2013;13:157.

10. Ndu IK, Ekwochi U, Osuorah CD, et al. Danger signs of childhood pneumonia: caregiver awareness and care seeking behavior in a developing country. *Int J Pediatr* 2015;2015:167261.
11. Kante AM, Gutierrez HR, Larsen AM, et al. Childhood illness prevalence and health seeking behavior patterns in rural Tanzania. *BMC public health* 2015;15:951.
12. Seidenberg PD, Hamer DH, Iyer H, et al. Impact of integrated community case management on health-seeking behavior in rural Zambia. *Am J Trop Med Hyg* 2012;87(5 Suppl):105-10.
13. Ukwaja KN, Talabi AA, Aina OB. Pre-hospital care seeking behaviour for childhood acute respiratory infections in south-western Nigeria. *Int Health* 2012;4(4):289-94.
14. Gelaw YA, Biks GA, Alene KA. Effect of residence on mothers' health care seeking behavior for common childhood illness in Northwest Ethiopia: a community based comparative cross-sectuibal study. *BMC Res Notes* 2014;7:705.
15. Abbey M, Chinbuah MA, Gyapong M, et al. Community perceptions and practices of treatment seeking for childhood pneumonia: a mixed methods study in a rural district, Ghana. *BMC Public Health* 2016;16(1):848.
16. Bakshi SS, McMahon S, George A, et al. The role of traditional treatment on health care seeking by caregivers for sick children in Sierra Leone: results of a baseline survey. *Acta Trop* 2013;127(1):46-52.
17. Kallander K, Hildenwall H, Waiswa P, et al. Delayed care seeking for fatal pneumonia in



## FATHERS' PERSPECTIVES ON CHILDHOOD PNEUMONIA

children aged under five years in Uganda: a case-series study. *Bull World Health Organ* 2008;86(5):332-

8.

18. D'Souza RM. Role of health-seeking behaviour in child mortality in the slums of Karachi, Pakistan. *J Biosoc Sci* 2003;35(1):131-44.

19. Tupasi TE, Radhakrishna S, Co VM, et al. Bacillary disease and health seeking behavior among Filipinos with symptoms of tuberculosis: implications for control. *Int J Tuberc Lung Dis* 2000;4(12):1126-32.

20. Noordam AC, Carvajal-Velez L, Sharkey AB, et al. Care seeking behaviour for children with suspected pneumonia in countries in sub-Saharan Africa with high pneumonia mortality. *PLoS One* 2015;10(2):e0117919.

21. Geldsetzer P, Williams TC, Kirolos A, et al. The recognition of and care seeking behaviour for childhood illness in developing countries: a systematic review. *PLoS One* 2014;9(4):e93427.

22. Vaismoradi M, Turunen H, Bondas T. Content analysis and thematic analysis: Implications for conducting a qualitative descriptive study. *Nurs Health Sci* 2013;15(3):398-405.

23. Hsieh HF, Shannon SE. Three approaches to qualitative content analysis. *Qual health res* 2005;15(9):1277-88.

24. Immy Holloway, Sephanie Wheeler. Qualitative research in nursing and health care. 3<sup>rd</sup> edn. West Sussex UK: *A John Wiley & Sons, Ltd.*, publication, 2010.

## FATHERS' PERSPECTIVES ON CHILDHOOD PNEUMONIA

- 1  
2  
3  
4 25. Republic of the Philippines, Philippines Statistics Authority. *Population of Region VIII -*  
5  
6  
7 *Eastern Visayas (Based on the 2015 Census of Population)*. 2016. [https://psa.gov.ph/content/population-](https://psa.gov.ph/content/population-region-viii-eastern-visayas-based-2015-census-population)  
8  
9  
10 [region-viii-eastern-visayas-based-2015-census-population](https://psa.gov.ph/content/population-region-viii-eastern-visayas-based-2015-census-population)  
11  
12  
13 (cited 20 Dec 2017).  
14  
15  
16 26. Asian Institute of Management. *Overview of health sector reform in the Philippines and*  
17  
18 *possible opportunities for public-private partnerships 2010*.  
19  
20  
21  
22 [file:///C:/Users/marisato/Downloads/health%20sector%20reform.pdf%20\(1\).pdf](file:///C:/Users/marisato/Downloads/health%20sector%20reform.pdf%20(1).pdf) (cited 20 Dec 2017).  
23  
24  
25 27. Schreiner M. *A simple poverty scorecard for the Philippines 2007*. *Philippine Journal of*  
26  
27  
28 *Development 2007;XXXIV:2*. <https://dirp3.pids.gov.ph/ris/pjd/pidspjd07-2poverty.pdf> (cited 20 Dec  
29  
30  
31 2017).  
32  
33  
34 28. Schreiner M. *Simple Poverty Scorecard Philippines 8 June 2014*.  
35  
36  
37 [http://www.microfinance.com/English/Papers/Scoring\\_Poverty\\_Philippines\\_2009\\_EN.pdf](http://www.microfinance.com/English/Papers/Scoring_Poverty_Philippines_2009_EN.pdf)  
38  
39  
40 (cited 20 Dec 2017).  
41  
42  
43 29. Mirzaei K, Milanifar A, Asghari F. Patients' perspectives of the substitute decision maker: who  
44  
45  
46 makes better decisions? *J Med Ethics* 2011;37(9):523-5.  
47  
48  
49 30. Kosai H, Tamaki R, Saito M, et al. Incidence and Risk Factors of Childhood Pneumonia-Like  
50  
51  
52 Episodes in Biliran Island, Philippines--A Community-Based Study. *PLoS One* 2015;10(5):e0125009.  
53  
54  
55 31. Deressa W, Ali A, Berhane Y. Household and socioeconomic factors associated with childhood  
56  
57

## FATHERS' PERSPECTIVES ON CHILDHOOD PNEUMONIA

febrile illnesses and treatment seeking behaviour in an area of epidemic malaria in rural Ethiopia. *Trans R Soc Trop Med Hyg* 2007;101(9):939-47.

32. Kozhimannil KB, Valera MR, Adams AS, et al. The population-level impacts of a national health insurance program and franchise midwife clinics on achievement of prenatal and delivery care standards in the Philippines. *Health Policy* 2009;92(1):55-64.

33. Obermann K, Jowett MR, Alcantara MO, et al. Social health insurance in a developing country: the case of the Philippines. *Soc Sci Med* 2006;62(12):3177-85.

34. Alvesson HM, Lindelow M, Khanthaphat B, et al. Coping with uncertainty during healthcare-seeking in Lao PDR. *BMC Int Health Hum Rights* 2013;13:28.

35. Philippine Herbal Medicine. *Ten (10) herbal medicines in the Philippines approved by the Department of Health (DOH)*. [http://www.philippineherbalmedicine.org/doh\\_herbs.htm](http://www.philippineherbalmedicine.org/doh_herbs.htm) (cited 20 Dec 2017).

36. Philippines Herbal Medicine. *Oregano (Origanum vulgare)*. <http://www.philippineherbalmedicine.org/oregano.htm> (cited 20 Dec 2017).

37. Kim SA, Capeding MR, Kilgore PE. Factors influencing healthcare utilization among children with pneumonia in Muntinlupa City, the Philippines. *Southeast Asian J Trop Med Public Health* 2014;45(3):727-35.

38. Morgan DJ, Okeke IN, Laxminarayan R, et al. Non-prescription antimicrobial use worldwide: a

## FATHERS' PERSPECTIVES ON CHILDHOOD PNEUMONIA

systematic review. *Lancet Infect Dis* 2011;11(9):692-701.

39. Le TH, Ottosson E, Nguyen TK, et al. Drug use and self-medication among children with respiratory illness or diarrhea in a rural district in Vietnam: a qualitative study. *J Multidiscip Healthc* 2011;4:329-36.
40. Kallander K, Tomson G, Nsungwa-Sabiiti J, et al. Community referral in home management of malaria in western Uganda: a case series study. *BMC Int Health Hum Rights* 2006;6:2.
41. McNee A, Khan N, Dawson S, et al. Responding to cough: Boholano illness classification and resort to care in response to childhood ARI. *Soc Sci Med* 1995;40(9):1279-89.
42. Iganus R, Hill Z, Manzi F, et al. Roles and responsibilities in newborn care in four African sites. *Trop Med Int Health* 2015;20(10):1258-64.
43. Franckel A, Lalou R. Health-seeking behaviour for childhood malaria: household dynamics in rural Senegal. *J Biosoc Sci* 2009;41(1):1-19.
44. Greene ME, Mehta M, Pulerwitz J, et al. "Involving Men in Reproductive Health: Contributions to Development" 17-24.  
<https://www.faihttoactionnetwork.org/resources/pdf/Involving%20Men%20in%20Reproductive%20Health-Contributions%20to%20Development.pdf> (cited 20 Dec 2017).
45. Bedford KJ, Sharkey AB. Local barriers and solutions to improve care-seeking for childhood pneumonia, diarrhoea and malaria in Kenya, Nigeria and Niger: a qualitative study. *PLoS One*

## FATHERS' PERSPECTIVES ON CHILDHOOD PNEUMONIA

2014;9(6):e100038.

46. Deutscher M, Beneden CV, Burton D, et al. Putting surveillance data into context: the role of health care utilization surveys in understanding population burden of pneumonia in developing countries. *J Epidemiol Glob Health* 2012;2(2):73-81.

47. World Health Organization. *Pneumonia Fact sheet*. 2016. <http://www.who.int/mediacentre/factsheets/fs331/en/> (cited 20 Dec 2017).

48. Su D, Huang TT, Anthony R, et al. Parental perception of child bodyweight and health among Mexican-American children with acanthosis nigricans. *J Immigr Minor Health* 2014;16(5):874-81.

49. Phimmasane M, Douangmala S, Koffi P, et al. Factors affecting compliance with measles vaccination in Lao PDR. *Vaccine* 2010;28(41):6723-9.

50. McNee A1, Khan N, Dawson S, et al. Responding to cough: Boholano illness classification and resort to care in response to childhood ARI. *Soc Sci Med* 1995;40(9):1279-89.

51. Davis J, Vyankandondera J, Luchters S, et al. Male involvement in reproductive, maternal and child health: a qualitative study of policymaker and practitioner perspectives in the Pacific. *Reprod Health* 2016;13(1):81.

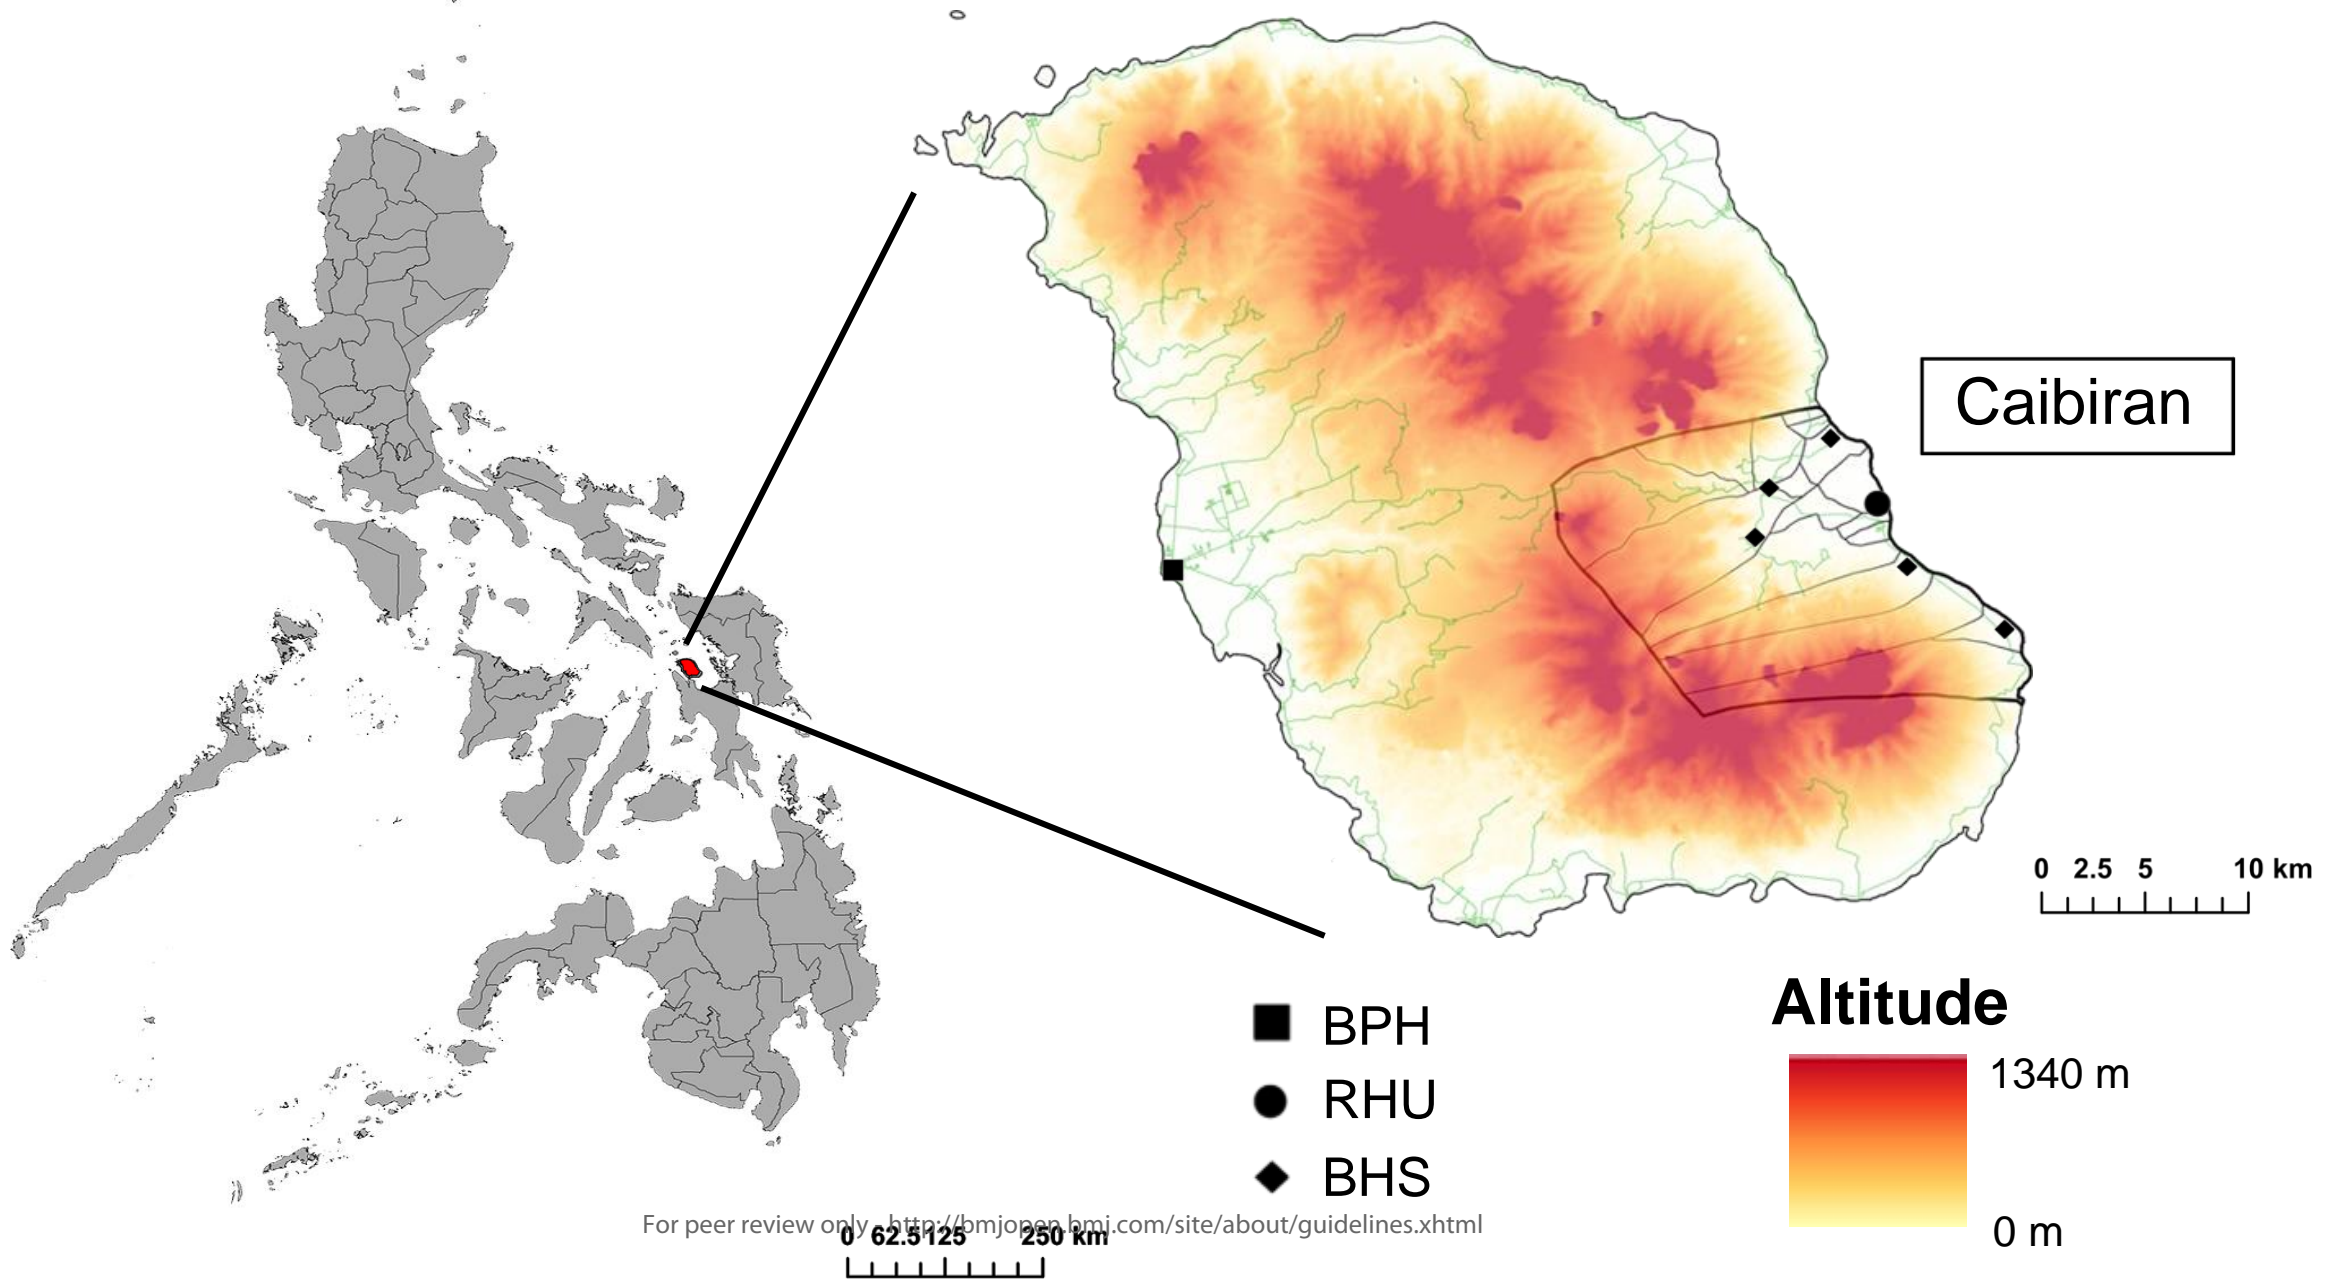

# BMJ Open

## Father's roles and perspectives on healthcare seeking for children with pneumonia: Findings of a qualitative study in a rural community of the Philippines

|                                 |                                                                                                                                                                                                                                                                                                                                                                                                                                                                                                                                                                                                                                                                                                                                                                                                                                                                                                                                                                        |
|---------------------------------|------------------------------------------------------------------------------------------------------------------------------------------------------------------------------------------------------------------------------------------------------------------------------------------------------------------------------------------------------------------------------------------------------------------------------------------------------------------------------------------------------------------------------------------------------------------------------------------------------------------------------------------------------------------------------------------------------------------------------------------------------------------------------------------------------------------------------------------------------------------------------------------------------------------------------------------------------------------------|
| Journal:                        | <i>BMJ Open</i>                                                                                                                                                                                                                                                                                                                                                                                                                                                                                                                                                                                                                                                                                                                                                                                                                                                                                                                                                        |
| Manuscript ID                   | bmjopen-2018-023857.R1                                                                                                                                                                                                                                                                                                                                                                                                                                                                                                                                                                                                                                                                                                                                                                                                                                                                                                                                                 |
| Article Type:                   | Research                                                                                                                                                                                                                                                                                                                                                                                                                                                                                                                                                                                                                                                                                                                                                                                                                                                                                                                                                               |
| Date Submitted by the Author:   | 08-Sep-2018                                                                                                                                                                                                                                                                                                                                                                                                                                                                                                                                                                                                                                                                                                                                                                                                                                                                                                                                                            |
| Complete List of Authors:       | Sato, Mari; Tohoku University Graduate School of Medicine, Department of Maternal Nursing<br>Oshitani, Hitoshi; Tohoku University Graduate School of Medicine, Virology Department<br>Tamaki, Raita ; Tohoku University Graduate School of Medicine, Virology Department<br>Oyamada, Nobuko; Tohoku University Graduate School of Medicine, Department of Maternal Nursing<br>Sato, Kineko; Tohoku University Graduate School of Medicine, Department of Maternal Nursing<br>Nadra, Alkaff; Tohoku University Graduate School of Medicine, Virology Department<br>Landicho, Jhoys; Research Institute for Tropical Medicine, Department of Epidemiology and Biostatics<br>Alday, Portia; Research Institute for Tropical Medicine, Department of Epidemiology and Biostatics<br>Lupisan, Socorro; Research Institute for Tropical Medicine, Office of Director<br>Tallo, Veronica; Research Institute for Tropical Medicine, Department of Epidemiology and Biostatics |
| <b>Primary Subject Heading</b>: | Qualitative research                                                                                                                                                                                                                                                                                                                                                                                                                                                                                                                                                                                                                                                                                                                                                                                                                                                                                                                                                   |
| Secondary Subject Heading:      | Health services research                                                                                                                                                                                                                                                                                                                                                                                                                                                                                                                                                                                                                                                                                                                                                                                                                                                                                                                                               |
| Keywords:                       | Health services research, Pneumonia, Qualitative study, Child health                                                                                                                                                                                                                                                                                                                                                                                                                                                                                                                                                                                                                                                                                                                                                                                                                                                                                                   |
|                                 |                                                                                                                                                                                                                                                                                                                                                                                                                                                                                                                                                                                                                                                                                                                                                                                                                                                                                                                                                                        |

SCHOLARONE™  
Manuscripts

**FATHERS' PERSPECTIVES ON CHILDHOOD PNEUMONIA****Title: Father's roles and perspectives on healthcare seeking for children with pneumonia:****Findings of a qualitative study in a rural community of the Philippines**Mari Sato<sup>1</sup>, Hitoshi Oshitani<sup>2</sup>, Raita Tamaki<sup>3</sup>, Nobuko Oyamada<sup>1</sup>, Kineko Sato<sup>1</sup>, Alkaff RaihanaNadra<sup>2</sup>, Jhoys Landicho<sup>4</sup>, Portia P. Alday<sup>4</sup>, Socorro Lupisan<sup>4</sup>, Veronica L. Tallo<sup>4</sup><sup>1</sup>Mari Sato, Assistant Professor, RN, RMW, Ph.D.

Department of Maternal Nursing, Tohoku University Graduate School of Medicine, Sendai, Japan

<sup>2</sup>Hitoshi Oshitani, Professor, MD, Ph.D.

Department of Virology, Tohoku University Graduate School of Medicine, Sendai, Japan

<sup>3</sup>Raita Tamaki, Senior Lecturer, MD, Ph.D.

Department of Life and Creative Sciences, Nagasaki Women's Junior College, Nagasaki, Japan

<sup>1</sup>Nobuko Oyamada, Associate Professor, RN, RMW, MScN

Department of Maternal Nursing, Tohoku University Graduate School of Medicine, Sendai, Japan

<sup>1</sup>Kineko Sato, Professor emeritus, RN, RMW, Ph.D.

Department of Maternal Nursing, Tohoku University Graduate School of Medicine, Sendai, Japan

<sup>2</sup>Alkaff Raihana Nadra, Doctoral student, MSc Medical Anthropology

Department of Virology, Tohoku University Graduate School of Medicine, Sendai, Japan

<sup>4</sup>Jhoys Landicho, Science Research Specialist, RN



**FATHERS' PERSPECTIVES ON CHILDHOOD PNEUMONIA**

Department of Epidemiology and Biostatistics, Research Institute for Tropical Medicine, Muntinlupa

City, Philippines

<sup>4</sup>Portia P. Alday, Supervising Science Research Specialist, RN

Department of Epidemiology and Biostatistics, Research Institute for Tropical Medicine, Muntinlupa

City, Philippines

<sup>4</sup>Socorro Lupisan, Director IV, MD, MSc

Office of Director, Research Institute for Tropical Medicine, Muntinlupa City, Philippines

<sup>4</sup>Veronica L. Tallo, Consultant / IRB Chair, Ph.D.

Department of Epidemiology and Biostatistics, Research Institute for Tropical Medicine, Muntinlupa

City, Philippines

**Corresponding author:**

Mari Sato:

Postal Address: Department of Maternal Nursing, Tohoku University Graduate School of Medicine,

2-1, Seiryomachi, Aoba-ku, Sendai, Japan, #980-8575

E-mail: mari.sato@med.tohoku.ac.jp

Tel. and Fax: +81-22-717-7957

Key Words: Health services research, Pneumonia, Qualitative study, Child health

Word count: 4,840

Reference count: 56

**FATHERS' PERSPECTIVES ON CHILDHOOD PNEUMONIA****Abstract**

**Objectives:** Pneumonia remains a primary cause of death for under-five children. It is possible to reduce the mortality impact from childhood pneumonia if caregivers recognize the danger signs of pneumonia and obtain appropriate healthcare. Among caregivers, research on fathers' healthcare seeking behaviours and perceptions are limited, whereas research on mothers is available. This study aims to reveal fathers' roles and perspectives with respect to the selection of care and treatment for children with pneumonia in a remote island of the Philippines.

**Design:** A qualitative research was carried out using semi-structured interviews.

**Setting and Participants:** The interviews were conducted with 12 fathers whose children had pneumonia-like episodes in the six months prior to the interview. Data analysis was performed using the concept analysis method to identify codes, which were merged into subcategories and categories. Finally, the themes were identified.

**Results:** Three themes were identified as part of fathers' roles, and two were identified as fathers' perspectives on various treatment options. Fathers took care of their sick children by not entrusting care only to mothers because they considered this as part of their role. Notably, fathers considered that arranging money for the child's treatment was a matter of prime importance. They selected a particular treatment based on their experiences and beliefs, including herbal medicine, home treatment, and visiting traditional healers and health facilities. Their decision was influenced by not only their perception of the severity of illness but also cultural beliefs on the cause of illness. Visiting health

**FATHERS' PERSPECTIVES ON CHILDHOOD PNEUMONIA**

1  
2  
3  
4 facilities, particularly during hospital admissions, causes significant financial burden for the family,  
5  
6  
7 which was the main concern of fathers.

8  
9 **Conclusion:** It is crucial to consider the cultural background and also imperative to address issues  
10  
11  
12 related to medical cost and the credibility of health facilities to improve fathers' healthcare seeking  
13  
14  
15 behaviour.

16  
17  
18  
19  
20  
21  
22  
23  
24  
25  
26  
27  
28  
29  
30  
31  
32  
33  
34  
35  
36  
37  
38  
39  
40  
41  
42  
43  
44  
45  
46  
47  
48  
49  
50  
51  
52  
53  
54  
55  
56  
57  
58  
59  
60

For peer review only

**FATHERS' PERSPECTIVES ON CHILDHOOD PNEUMONIA****Strengths and limitations of this study**

- While most previous studies focused on mothers' healthcare seeking behaviour for their children with pneumonia, this study emphasized the roles and perspectives of fathers, which are of key importance when making a final decision in healthcare seeking.
- We employed the framework of the theory of planned behaviour to discuss what factors influenced fathers' intention in selecting care and treatment for their children with pneumonia.
- While this study only considered a rural municipality in the Philippines and interviews were conducted with only 12 fathers, it does suggest that the medical cost and credibility of health facilities are likely to affect healthcare seeking behaviour in similar settings.

## FATHERS' PERSPECTIVES ON CHILDHOOD PNEUMONIA

### BACKGROUND

Although the under-five mortality rate has significantly reduced in the past decades, it is still estimated that 5.9 million children died in 2015 worldwide.<sup>1</sup> Most of these deaths occur in low- and middle-income countries owing to preventable or treatable infectious diseases such as pneumonia, diarrhoea, and malaria.<sup>1</sup>

The Philippines is a lower middle-income country located in Southeast Asia.<sup>2</sup> Although the under-five mortality rate dropped from 59 per 1,000 in 1990 to 29 per 1,000 in 2010,<sup>3</sup> pneumonia remains the leading cause of deaths for children aged 1–4 years.<sup>4</sup> The Philippines promotes the integrated management of childhood illness (IMCI) approach, which aims to reduce death, illness, and disability from common childhood diseases including pneumonia. IMCI has both preventive and curative elements.<sup>5</sup> Effective antibiotics for bacterial pneumonia are usually available in most health facilities in the Philippines. Therefore, early recognition of danger signs of pneumonia by caregivers and appropriate healthcare seeking can prevent deaths from childhood pneumonia.<sup>6–8</sup> However, only half of the children with pneumonia in the Philippines have received treatment from appropriate providers.<sup>4</sup>

Most previous studies have analysed healthcare seeking behaviours and perceptions of mothers regarding childhood pneumonia.<sup>9–14</sup> Mothers had poor knowledge of the aetiology and danger signs of pneumonia.<sup>10, 13</sup> They often self-medicate children with antibiotics and traditional medicines<sup>15–17</sup> and take them to a traditional healer,<sup>18, 19</sup> which may delay appropriate treatment.

## FATHERS' PERSPECTIVES ON CHILDHOOD PNEUMONIA

Factors associated with health seeking behaviours include caregivers' age, healthcare cost, distance to health facilities, knowledge of danger signs, and children's age.<sup>14,20,21</sup> Moreover, fathers' educational status had a significant effect on mothers' healthcare seeking behaviour.<sup>14</sup> Previous research showed that although mothers generally play an important role as the primary caregiver for a sick child, fathers' opinions affect the decision of healthcare seeking.<sup>16</sup> However, fathers' ideas and the reasons behind the decision to seek healthcare remain largely unknown. This study was conducted to reveal fathers' roles and perspectives on the selection of care and treatment for childhood pneumonia in a remote island of the Philippines.

The theory of planned behaviour (TPB) is one of the influential models for identifying a decision making process to translate into action.<sup>22-25</sup> In the TPB, there are three belief-based constructs: attitudes, subjective norms, and perceived behavioural control.<sup>25</sup> When a person intends to perform a given behaviour, the intention is influenced by his or her own attitude, subjective norms, and perceived behavioural control.<sup>22-25</sup> Behaviour of fathers' health seeking for their sick children may be driven by their intention to decide, which in turn will be influenced by several factors. Based on the TPB framework, we discussed what factors influenced their intention when fathers selected care and treatment for their children.

## METHODS

### Study design

This study employed a qualitative investigation method using semi-structured individual

## FATHERS' PERSPECTIVES ON CHILDHOOD PNEUMONIA

1  
2  
3  
4 interviews. We used a qualitative content analysis approach, which is suitable for analysing the  
5  
6 common issues mentioned in describing data,<sup>26</sup> interpreting meaning from the content of text data,<sup>27</sup>  
7  
8 and systematically categorizing and summarizing large volumes of data.<sup>28</sup> Qualitative content analysis  
9  
10 is mainly inductive and is not based on previous theories or hypotheses.<sup>27,28</sup> We believe that this  
11  
12 analytical approach is appropriate to extract categories from meaningful statements.  
13  
14  
15  
16

### Study area

17  
18  
19  
20  
21 The study was conducted in the Municipality of Caibiran of Biliran Province in the Eastern  
22  
23 Visayas Region of the Philippines (Figure 1). Biliran Province has 172,000 inhabitants and consists of  
24  
25 one main island (Biliran Island) and other small islands. The province has eight municipalities, and  
26  
27 Caibiran is one of them with a population of around 22,500.<sup>29</sup> Tohoku University Graduate School of  
28  
29 Medicine in Japan and the Research Institute for Tropical Medicine (RITM) in the Philippines  
30  
31 conducted a joint research project titled 'Comprehensive Etiological and Epidemiological Study on  
32  
33 Acute Respiratory Infections in Children' from 2011 to 2017. The main objective of this project was  
34  
35 to provide evidence to reduce the impact of paediatric acute respiratory infections including  
36  
37 pneumonia. The project's main component was a cohort study conducted in Biliran Island, including  
38  
39 the Municipality of Caibiran, with children under five years of age. Therefore, we selected Caibiran as  
40  
41 our study site.  
42  
43  
44  
45  
46  
47  
48  
49  
50

51  
52 The Philippines has public sector primary health facilities and hospitals. Barangay Health  
53  
54 Stations (BHS) and Rural Health Units (RHU) provide primary health services. BHS provides pre-  
55  
56  
57  
58  
59  
60

## FATHERS' PERSPECTIVES ON CHILDHOOD PNEUMONIA

1  
2  
3  
4 and post-natal care, immunization, health education, and limited clinical consultation with one  
5  
6 assigned midwife and several barangay health workers (health volunteers). RHU provides outpatient  
7  
8 care, delivery, and the same services as BHS with one qualified doctor and several nurses and  
9  
10 midwives. Each province usually has one provincial hospital and some district hospitals.<sup>30</sup> Caibiran  
11  
12 has one RHU and six BHS. Biliran Provincial Hospital (BPH), a secondary level referral hospital, the  
13  
14 only hospital in Biliran Province, is located in Naval, the capital of the province, around 30 km away  
15  
16 from Caibiran.  
17  
18  
19  
20  
21  
22

### Participants

23  
24  
25  
26 Participants of this study were fathers whose children were registered in the childhood  
27  
28 pneumonia study, in which children under five years of age were observed to define the incidence,  
29  
30 aetiology, and risk factors for pneumonia. Caregivers of children in the intervention study were  
31  
32 requested to record symptoms of acute respiratory infections such as a cough, difficulty breathing, and  
33  
34 chest indrawing. We used the purposive sampling method, checking all registered records, and  
35  
36 identified children who had pneumonia-like episodes (a cough or difficulty breathing, plus chest  
37  
38 indrawing) in the six months prior to the interviews with fathers. Fourteen fathers were extracted but  
39  
40  
41  
42  
43  
44  
45  
46  
47  
48  
49  
50  
51  
52  
53  
54  
55  
56  
57  
58  
59  
60  
two fathers were excluded; one went away to work in the capital city of Manila and another was  
divorced and living apart with the child before the interview. Finally, 12 fathers were selected as  
participants.

### Patient and Public Involvement



## FATHERS' PERSPECTIVES ON CHILDHOOD PNEUMONIA

Patients were not involved in the development of the research question; the design of ,  
recruitment for, and conduct of the study; or in the dissemination of the study's findings.

### Data collection

Semi-structured interviews were conducted from 18 to 22 November 2016 using open-ended questions. The questions sought information on fathers' perceptions of pneumonia, their behaviour and actions for care and treatment, and roles and responsibilities when children had pneumonia-like episodes. We did not ask questions based on each TPB item – intention, attitude, subjective norms, and perceived behaviour control – as we wanted to obtain the entire picture regarding fathers' views. Prior to asking the main questions, we also asked some questions to obtain demographic information and necessary data to assess the socio-economic status (SES) of the household. We used a simple poverty scorecard to assess the household SES using 10 simple questions.<sup>31,32</sup> The maximum total score was 100 and the minimum was 0, with a lower score indicating a lower SES.

Face-to-face interviews were conducted in English and three interpreters took turn to translate the questions and answers from English to the local language, and vice versa. The interpreters were female nurses and were fluent in the Waray-Waray language (the main local language of the Municipality of Caibiran) and English. Prior to conducting the interviews, a researcher trained the three interpreters in the research objectives, contents, and interview procedure. All interviews were conducted at the participants' house by a team of three members including the main interviewer (the first author who had prior experience in qualitative research and global health), the main interpreter

**FATHERS' PERSPECTIVES ON CHILDHOOD PNEUMONIA**

(translating English into Waray-Waray and vice versa), and an assistant interpreter (supporting the main interpreter and recording field notes). The interviewer and participants did not have any relationships prior to the commencement of the study. On a few occasions, participants' small children interrupted the interviews, which needed to be delayed until they disappeared. At the end of interviews, the assistant interpreter summarized the fathers' answers to confirm the interview findings with the fathers and the interviewer. All interviews were audio recorded with permission from the participants, and lasted 22–54 minutes (average: 32.9 minutes). No further interviews were considered necessary as the interviewer and the assistants agreed that data saturation was reached.

**Data analysis**

The interviews were transcribed in Waray-Waray, and the transcription was translated into English by an interpreter. The English translation was back-translated into Waray-Waray to verify the accuracy. The English-transcribed interviews were checked and re-read several times to eliminate ambiguities. The first author then selected the meaningful units from the transcript according to the study objectives, which were then refined and assigned codes. Selected codes were verified by the other three researchers to ensure the code reflected the meaning of each unit. After identifying all codes, the researchers grouped them into subcategories based on similarities and differences. These subcategories were eventually combined into main categories.<sup>27, 28</sup> Finally, the themes were identified as factors affecting fathers' health seeking behaviours. During the analysis, the researchers engaged in extensive discussions until consensus was reached on codes, subcategories, main categories, and

## FATHERS' PERSPECTIVES ON CHILDHOOD PNEUMONIA

1  
2  
3  
4 themes. The researchers discussed their findings and any coding discrepancies to maximize rigour and  
5  
6  
7 reliability. We followed the Consolidated Criteria for Reporting Qualitative Health Research  
8  
9  
10 (COREQ) checklist which is shown in Supplementary Appendix Table 1.

### Ethical approval

11  
12  
13  
14  
15 The study conformed to the Helsinki Declaration. All fathers who participated in interviews  
16  
17  
18 were informed about the study, associated risks, and benefits, and voluntary participation was  
19  
20  
21 obtained verbally and in writing. Interviews were conducted only after obtaining the fathers' written  
22  
23  
24 informed consent. The study protocol was approved by the Ethics Committee of Tohoku University  
25  
26  
27 Graduate School of Medicine (No. 2014-1-790) and the Institutional Review Board of RITM in the  
28  
29  
30 Philippines (No. 2016-25).

### RESULTS

31  
32  
33  
34  
35 Participant demographics are provided in Table 1. The mean age of the participants was 32.7  
36  
37  
38 (SD±9.5), and half of them were in their 20s. Five had not completed elementary school, and four had  
39  
40  
41 studied beyond the high school level. All participants had jobs. Except for one participant, all others  
42  
43  
44 had two to seven children, with a mean of 3.2 (SD±1.7). Eight had experienced admitting at least one  
45  
46  
47 of their children in a hospital in the past. The SES scorecard ranged from 14 to 57, with a mean of  
48  
49  
50 28.6 (SD±12.8). Out of the 12 households, scores of 8 households were less than 31, which is the  
51  
52  
53 national poverty threshold, meaning the minimum level of income in the Philippines.<sup>27, 28</sup> Among  
54  
55  
56 children who had a pneumonia-like episode, three were female, nine were male, and four were under  
57  
58  
59  
60

**FATHERS' PERSPECTIVES ON CHILDHOOD PNEUMONIA**

1  
2  
3  
4  
5  
6  
7  
8  
9  
10  
11  
12  
13  
14  
15  
16  
17  
18  
19  
20  
21  
22  
23  
24  
25  
26  
27  
28  
29  
30  
31  
32  
33  
34  
35  
36  
37  
38  
39  
40  
41  
42  
43  
44  
45  
46  
47  
48  
49  
50  
51  
52  
53  
54  
55  
56  
57  
58  
59  
60

one year of age.

For peer review only

## FATHERS' PERSPECTIVES ON CHILDHOOD PNEUMONIA

Table 1: Demographic characteristics of the participants

| Demographic details (range)                            | Mean (SD)      | N  | %  |
|--------------------------------------------------------|----------------|----|----|
| Age 23-52 years old)                                   | 32.7 (SD±9.5)  |    |    |
| 20-29                                                  |                | 6  | 50 |
| 30-39                                                  |                | 3  | 25 |
| 40-49                                                  |                | 2  | 17 |
| ≥ 50                                                   |                | 1  | 8  |
| Education                                              |                |    |    |
| Not completed elementary school                        |                | 5  | 42 |
| Not completed high school                              |                | 4  | 33 |
| Beyond high school education                           |                | 3  | 25 |
| Occupation                                             |                |    |    |
| Farmer                                                 |                | 4  | 33 |
| Fisherman                                              |                | 2  | 17 |
| Driver                                                 |                | 2  | 17 |
| Others                                                 |                | 4  | 33 |
| No. of children (1-7 children)                         | 3.2 (SD±1.7)   |    |    |
| 1                                                      |                | 1  | 8  |
| 2                                                      |                | 4  | 33 |
| 3                                                      |                | 4  | 33 |
| ≥ 4                                                    |                | 3  | 25 |
| Experience of previous hospitalization of any children |                |    |    |
| Yes                                                    |                | 8  | 67 |
| No                                                     |                | 4  | 33 |
| Experience of losing any children in the past          |                |    |    |
| Yes                                                    |                | 2  | 17 |
| No                                                     |                | 10 | 83 |
| Simple Poverty Scorecard (14-57)                       | 28.6 (SD±12.8) |    |    |
| <31                                                    |                | 8  | 67 |
| ≥ 31                                                   |                | 4  | 33 |
| Gender of the child with pneumonia-like episode        |                |    |    |
| Female                                                 |                | 3  | 25 |
| Male                                                   |                | 9  | 75 |
| Age of the child with pneumonia-like episode (years)   |                |    |    |
| <1                                                     |                | 4  | 33 |
| 1-<2                                                   |                | 2  | 17 |
| 2-<3                                                   |                | 3  | 25 |
| 3-<4                                                   |                | 2  | 17 |
| 4-<5                                                   |                | 1  | 8  |

## FATHERS' PERSPECTIVES ON CHILDHOOD PNEUMONIA

### Fathers' role

Three themes were identified in relation to fathers' role in caring for a sick child: belief in their own judgment, arranging money, and responsibility as the leader of the family (Table 2). Brief transcripts of the fathers' interviews are shown as examples, which are indicated in italics with the fathers' identity number (F1–F12).

Table 2: Themes and categories of fathers' role identified from in-depth interviews with fathers whose children had pneumonia-like episodes in Biliran Island, the Philippines

| Themes                                     | Categories                                                                 |
|--------------------------------------------|----------------------------------------------------------------------------|
| Belief in their own judgment               | Fathers observe and care for their sick child at home for a few days       |
|                                            | Some fathers do not know about pneumonia                                   |
| Arranging money                            | Fathers work and save money for their child's treatment                    |
|                                            | Money issues come first to fathers' minds when their child is hospitalized |
| Responsibility as the leader of the family | Fathers intend to take responsibility for their child                      |
|                                            | Fathers assist mothers who play a key role in caring for a sick child      |

### Belief in their own judgment

Five fathers mentioned that they checked and treated their child at home when he/she had a cough and fever for a few days instead of immediately taking the child to a health facility. Fathers checked for fever by touching the child's forehead and observed other symptoms such as nonstop crying, restlessness, and loss of appetite. One father cuddled his child to make him/her feel better, and another cleaned the child's surroundings. Seven fathers knew that applying cold water reduced fever:

**FATHERS' PERSPECTIVES ON CHILDHOOD PNEUMONIA**

1  
2  
3  
4 *'We know how to give first aid. If my child has fever, we wipe him with a wet towel to lower his*  
5  
6 *temperature (F10)'.*  
7

8  
9 Fathers believed that a sick child needed nutritious foods, such as fruits, vegetables, eggs, and  
10  
11 fish, and easy-to-digest foods such as porridge. One father recognized the importance of the child  
12  
13 drinking an adequate amount of water. Some fathers bought biscuits or soft drinks, which they usually  
14  
15 could not afford, and one father gave what his own mother used to give him when he was sick in his  
16  
17 early childhood: *'If I have money, I buy eggs for my sick child. If I don't, I just buy royal (soft drink),*  
18  
19 *because that was what my mother used to give me (F6)'.*  
20  
21  
22  
23  
24  
25

26 Ten fathers had heard of pneumonia. One of them whose family member had been diagnosed  
27  
28 with pneumonia remembered details such as symptoms and treatment. Two fathers had never heard of  
29  
30 pneumonia. Their recognition of pneumonia symptoms varied, covering cough, asthma, weakness,  
31  
32 irritability, fever, difficulty in breathing, crackling sound in the chest, and convulsions: *'She had a*  
33  
34 *hard cough, she had difficulty breathing, a crackling sound could be heard when she would breathe.*  
35  
36 *That's what I observed in my child (F2)'.*  
37  
38  
39  
40  
41  
42

**Arranging money**

43  
44  
45 Fathers believed that it was their responsibility to earn money for their family needs,  
46  
47 including money necessary to treat and to prepare for their child's illness. One father who had lost his  
48  
49 first child saved money whenever he had extra income: *'We usually save even 50 pesos if we make*  
50  
51 *extra, because we do not know when the child may need to go to a hospital again (F4)'.*  
52  
53  
54  
55  
56  
57

**FATHERS' PERSPECTIVES ON CHILDHOOD PNEUMONIA**

1  
2  
3  
4           When hospitalization was required, fathers first thought of money. Most fathers had struggled  
5  
6 with money issues, such as figuring out from whom to borrow and how to repay the loan. Most of  
7  
8 them borrowed money from their relatives and friends. Some fathers asked for financial help from  
9  
10 politicians for their children's hospital expenses. Some of them were still repaying debt: *'I felt*  
11  
12 *different. I was afraid. I was worried because I did not have any money. I looked for money and asked*  
13  
14 *for it from my neighbours (F1)'*.

**Responsibility as the leader of the family**

20  
21  
22  
23           Fathers considered themselves the leader of the family who solves any problem that occurs in  
24  
25 the family. They took various actions to improve their sick child's health, such as seeking information  
26  
27 from other people: *'I look after my children, wipe them if they are sweating, and I ask other people*  
28  
29 *about what to do (F6)'*. Fathers were also the main decision makers regarding which facility to use.  
30  
31  
32 Although fathers discussed such matters with mothers, they were proud to be the primary decision  
33  
34 maker: *'If I see that my child is unwell, I bring him to RHU. I talk to my wife, but I am the one who*  
35  
36 *decides (F6)'*.

37  
38  
39  
40  
41  
42  
43           Although fathers helped care for their sick children, mothers were the main caregivers. Three  
44  
45 fathers had never accompanied a child to RHU, and two fathers had only dropped off the mother and  
46  
47 child in front of the RHU. Fathers assisted mothers in caring for a sick child: *'I gave my wife some ice.*  
48  
49 *I waited for the ice to melt and then wiped the child (F9)'*.

50  
51  
52  
53  
54  
55  
56  
57  
58  
59  
60  
Father's experiences of and perspectives on various treatment options (Table 3)



## FATHERS' PERSPECTIVES ON CHILDHOOD PNEUMONIA

Two themes were identified in relation to fathers' experiences of and perspectives on various treatment options: fathers' way of taking care of their sick children and their preference of health facilities (Table 3).

Table 3: Themes and categories of fathers' experiences and perspectives identified from in-depth interviews with fathers whose children had pneumonia-like episodes in Biliran Island, the Philippines

| Themes                                             | Categories                                                                              |
|----------------------------------------------------|-----------------------------------------------------------------------------------------|
| Fathers' way of taking care of their sick children | Herbal medicines are easy to prepare at home                                            |
|                                                    | Some fathers keep a stock of medicines at home                                          |
|                                                    | Some fathers do not have enough knowledge about medication                              |
| Fathers' preference of health facilities           | Fathers takes their child to a traditional healer because of their therapeutic efficacy |
|                                                    | Fathers generally do not prefer BHS                                                     |
|                                                    | Fathers take their child to RHU for a medical consultation                              |
|                                                    | Fathers expect to receive medicines for their sick child from RHU                       |
|                                                    | Fathers prefer to be seen by a staff member with medical expertise                      |
|                                                    | Fathers rely on health staff advice to refer their child to a hospital                  |

### Fathers' way of taking care of their sick children

Fathers procured herbal medicines for a cough from a garden or from neighbours. Most fathers believed that oregano and five-leaved chaste tree leaves were effective for a cough and asked mothers to make herbal medicines for the child. Fathers had their own methods of preparing herbal medicine: just boiling the leaves in water, crushing or steaming the leaves, and squeezing out the juice.

Three fathers added lemon and sugar or milk to the medicine for taste. Three fathers recognized that

**FATHERS' PERSPECTIVES ON CHILDHOOD PNEUMONIA**

herbal medicines could have limited effectiveness, two fathers had never used them, and two fathers avoided using them: *'We used oregano because it is easy to use. A cough was relieved by the herbal medicine but relapsed after getting better once (F12)'*.

Fathers used two kinds of medicines for their children: antibiotics for a cough and antipyretics for fever. Three fathers did not have any stock of medicines at home. Some of them bought medicines without prescription at a pharmacy, while some asked neighbours and relatives to give them medicines: *'I asked my mother-in-law for medicine since she had a stock of medicines from the congressman (F9)'*. Although fathers used Western medicines such as antibiotics, they did not know their names or dosage. Mothers handled these aspects. One father had no idea what antibiotics were: *'We gave the child paracetamol liquid, but I do not know the dosage. I don't have any idea what antibiotics are. What is that? I think it is cephalexin (F8)'*.

Taking a sick child to a traditional healer was a common choice of fathers. Most fathers brought their children to RHU after a traditional healer failed to treat the child. One father used both RHU and a traditional healer on the same day, another father took his child to a traditional healer when the child did not recover after going to RHU, and the others took their children to a traditional healer after providing them with home treatment: *'If my child has fever, we bring him to the traditional healer. In a few days, he gets better (F6)'*.

Fathers believed that suffering from a sprain, fracture, or some other pain made the child sick with fever, cough, or vomiting: *'Sometimes when the child had fever, people said the child had piang*

**FATHERS' PERSPECTIVES ON CHILDHOOD PNEUMONIA**

1  
2  
3  
4 *(sprain or dislocation of tissues or bones). Sometimes when the child experienced body pain, the child*  
5  
6 *had fever (F5)*. A traditional healer generally checks nerves, applies a liniment, and gives the child a  
7  
8  
9  
10  
11  
12  
13  
14  
15  
16  
17  
18  
19  
20  
21  
22  
23  
24  
25  
26  
27  
28  
29  
30  
31  
32  
33  
34  
35  
36  
37  
38  
39  
40  
41  
42  
43  
44  
45  
46  
47  
48  
49  
50  
51  
52  
53  
54  
55  
56  
57  
58  
59  
60  
*massage while chanting rituals. Fathers believed a traditional healer's treatment to be effective as they*  
*had seen their child recover after receiving such treatment: 'When my child was treated by a*  
*traditional healer, he seemed at ease. I was free from worry (F12)*'. Traditional healers charge a small  
amount of money and do not have a fixed fee. One father did not like to go to a traditional healer as he  
thought it risky: *'I don't like traditional healers. I cannot take a risk when it comes to my child. I*  
*prefer to bring him to RHU first. I don't like to take him to a traditional healer (F2)*'.

**Fathers' preference of health facilities**

Fathers generally did not prefer to take their child to BHS. They preferred taking the child  
directly to RHU without using BHS, because the latter has insufficient equipment, and fathers  
perceive that it is closed all the time. Two fathers noted that BHS staff always referred a child either to  
an RHU or to a hospital.

Fathers preferred RHU because of its closer distance and availability of medicines. RHU  
provides medicines for free if they have a stock. However, when there was no stock of medicines at  
RHU, they had to buy medicines themselves: *'When my child's condition became worse with a cough*  
*with sputum, we brought him to RHU. But they did not have a stock of medications. I paid 105 pesos*  
*for amoxicillin (F6)*'. Some of them could not afford to buy medicines because they did not have  
enough money: *'RHU staff gave me a prescription. But I could not buy the medicines as I did not have*

**FATHERS' PERSPECTIVES ON CHILDHOOD PNEUMONIA**

1  
2  
3  
4 *enough money (F2)*’.

5  
6 Fathers thought that RHU staff had good knowledge about diseases and knew how to cure the  
7  
8  
9 child. Some fathers had witnessed RHU staff listening to the child’s chest sounds, fanning a child to  
10  
11  
12 bring down the fever, and using oxygen or a nebulizer when the child had difficulty breathing: ‘RHU  
13  
14  
15 *staff used a fan for my child to relieve fever. Only in the case that he suffers from difficulty in*  
16  
17  
18 *breathing, they use something like oxygen and nebulizer. It heated and made steam (F10)*’.

19  
20 Fathers took their children to RHU to be checked, particularly by a doctor: ‘*I think that only a*  
21  
22  
23 *doctor knows what kind of medicines my child needs, and we are not convinced unless a doctor checks*  
24  
25  
26 *my child (F1)*’. However, they recognized that a doctor was not always available and that only some  
27  
28  
29 nurses and midwives might be available at RHU. Nurses at RHU sometimes referred a child to a  
30  
31  
32 hospital when they could not handle the situation themselves: ‘*Once, a nurse prescribed antibiotics*  
33  
34  
35 *for a cough when I brought my child to RHU. I argued with her because she was not a doctor (F11)*’.

36  
37 Eight fathers had past experiences of having admitted their children to a hospital for different  
38  
39  
40 reasons, with the treatment leading to recovery. Some fathers took their children to a hospital when  
41  
42  
43 their condition became serious. Fathers mostly complied with the doctor’s recommendation to go to a  
44  
45  
46 hospital. One father did not comply with such a recommendation when he did not have any money: ‘*If*  
47  
48  
49 *it is an emergency, surely, I bring my child to a hospital. The important thing is for my child to be*  
50  
51  
52 *okay (F2)*’.

**DISCUSSION**

**FATHERS' PERSPECTIVES ON CHILDHOOD PNEUMONIA**

1  
2  
3  
4 The study revealed that fathers monitored their sick child at home by assessing the child's  
5  
6 symptoms and providing some care, since they considered these as part of their role as fathers. This  
7  
8 role comprises their subjective norms as the breadwinner of their family, which is a constitutive part  
9  
10 of the TPB. Though mothers are the main caregivers,<sup>11-14</sup> fathers did not entrust the care of their sick  
11  
12 children solely to mothers. As confirmed by previous studies, fathers play an important role in  
13  
14 financing for child care.<sup>33</sup> They recognized this as their responsibility and attempted to fulfil it. In this  
15  
16 study, it was found that paying incidental costs, such as those for medicine, posed a significant  
17  
18 problem for fathers when healthcare facilities including hospitals could not provide free medication  
19  
20 for their children. Our study participants were generally poor, and our previous study conducted in  
21  
22 Biliran Island indicated that low SES scores were associated with a higher incidence of  
23  
24 pneumonia-like episodes.<sup>34</sup> Moreover, there was a positive correlation between SES and the  
25  
26 proportion of appropriate healthcare seeking behaviours in a study in Ethiopia.<sup>35</sup> Although the  
27  
28 Philippines has a health insurance scheme called the Philippine Health Insurance Corporation  
29  
30 (PhilHealth)<sup>36</sup> that covers around 79 percent of the population to improve universal health coverage, it  
31  
32 does not cover full costs of treatment,<sup>37</sup> such as the out-of-pocket cost for medication when health  
33  
34 facilities do not have a stock of medicines. A high level of out-of-pocket payments influences the  
35  
36 utilization rates of public healthcare.<sup>38</sup> As most participants had difficulties in paying the treatment  
37  
38 cost for hospitalization, this may be a primary barrier for appropriate health seeking, particularly  
39  
40 taking children to the hospital for admission. This treatment cost and financing issue could be one of  
41  
42  
43  
44  
45  
46  
47  
48  
49  
50  
51  
52  
53  
54  
55  
56  
57  
58  
59  
60

**FATHERS' PERSPECTIVES ON CHILDHOOD PNEUMONIA**

1  
2  
3  
4 the main factors of perceived behavioural control that affect fathers' intention to select health facilities,  
5  
6 that is, fathers' healthcare seeking.  
7

8  
9           Herbal medicines were also commonly used by our study participants. The Philippines  
10  
11 government promotes the use of some herbal medicines that are cheap and readily available.<sup>39, 40</sup>  
12  
13 Fathers also used antipyretics for fever, and antibiotics and herbal medicines to treat coughs at home.  
14  
15 Providing treatment at home might be one of the components of behavioural attitude since fathers  
16  
17 may resort to home treatment when they perceive the condition of their sick children as mild. A  
18  
19 previous study in the Philippines revealed that 43 percent of caregivers bought medications without a  
20  
21 prescription and that they engaged in home treatment to save time and money.<sup>41</sup> The use of drugs  
22  
23 without a prescription, particularly antibiotics, is of concern. Home treatment is risky because of its  
24  
25 low effectiveness and potential side effects, including the emergence of antimicrobial resistance.<sup>42</sup>  
26  
27 However, caregivers are usually not aware of side-effects and drug efficacy.<sup>43</sup> Additionally, a gap may  
28  
29 exist between illness recognition and seeking outside care because of the wait to complete a drug  
30  
31 course, which can result in a major delay in getting appropriate treatment.<sup>17, 44</sup> Previous studies have  
32  
33 shown that home treatment is associated with a delay in seeking appropriate treatment.<sup>9, 13</sup> It is not  
34  
35 practical to bring all children with acute respiratory infections to health facilities since these  
36  
37 symptoms are very common among children and the majority are self-limited. However, caregivers  
38  
39 including fathers should recognize the danger signs of pneumonia, which require urgent medical  
40  
41 attention.  
42  
43  
44  
45  
46  
47  
48  
49  
50  
51  
52  
53  
54  
55  
56  
57  
58  
59  
60

**FATHERS' PERSPECTIVES ON CHILDHOOD PNEUMONIA**

1  
2  
3  
4 Fathers play an important role in deciding the care or treatment that is provided at home or at  
5  
6 health facilities. A previous study indicated that most mothers decided to seek assistance from outside  
7  
8 the home after discussing the situation with their husbands,<sup>45</sup> and some studies showed that fathers  
9  
10 play the role of the primary decision maker regarding their children's health seeking.<sup>33,46-48</sup> Three key  
11  
12 steps were shown to prevent pneumonia deaths of children aged under five: recognizing that a child is  
13  
14 sick, seeking appropriate care, and treating appropriately with antibiotics.<sup>6</sup> In our study, fathers did not  
15  
16 have a clear understanding of pneumonia symptoms and danger signs of sick children, and little  
17  
18 understanding of the danger signs and severity could affect fathers' attitude to immediately access  
19  
20 appropriate healthcare services. Mothers know the disease named pneumonia but have poor  
21  
22 knowledge of the aetiology and danger signs of probable pneumonia.<sup>10,12</sup> It is usually difficult to  
23  
24 recognize the seriousness of certain acute respiratory infections such as pneumonia.<sup>7</sup> The positive  
25  
26 predictive value of caregiver diagnosis and knowledge of pneumonia was lower than that of those of  
27  
28 diarrhoea and malaria.<sup>21,49</sup> The lack of recognition of signs of severe illness by caregivers is the most  
29  
30 commonly cited reason for not seeking appropriate healthcare.<sup>50</sup> Caregivers with a lower level of  
31  
32 education are more likely to resort to home treatment and/or traditional healers as their initial action,<sup>10</sup>  
33  
34 and they should therefore be provided with the necessary knowledge about pneumonia.<sup>6,51</sup> Generally,  
35  
36 health education programs in the community target mothers and fathers who have fewer opportunities  
37  
38 to expand their knowledge. Considering their important role in the decision-making process, it is  
39  
40 necessary to offer health education programs to increase fathers' knowledge and make the healthcare  
41  
42  
43  
44  
45  
46  
47  
48  
49  
50  
51  
52  
53  
54  
55  
56  
57  
58  
59  
60

**FATHERS' PERSPECTIVES ON CHILDHOOD PNEUMONIA**

system more trustworthy to fathers.<sup>52, 53</sup>

Fathers were found to take their own decisions in selecting facilities for treatment. They took their children to traditional healers when they thought that the child had 'piang' before visiting RHU. Piang refers to a sprain or dislocation of tissues or bones in the chest or back, which result in symptoms such as fever and cough.<sup>54</sup> When they believed that the child had an accident or sprain, they tended to prefer traditional healers. Such a cultural belief may also be an important component of fathers' attitude. Based on this belief, fathers preferred to visit traditional healers despite the unfavourable evaluation of the outcome of the child's symptoms. In the Philippines, people often consider a cough and fever to be caused by 'piang'. Illness in the 'piang' complex can be traced back to the child falling down or being handled incorrectly by their mothers or elder siblings, and it is generally believed that only traditional healers can treat this condition.<sup>54</sup> Such local beliefs might be a hidden barrier for inappropriate healthcare seeking behaviour and could lead to delay in consulting medical professionals at appropriate health facilities.<sup>54</sup> Since cultural and social beliefs about the causation and treatment of illness cannot be ignored, it is crucial to understand them to promote appropriate healthcare seeking behaviours. Furthermore, fathers prefer to use traditional healers because of the mode of payment. The mechanism of paying a traditional healer is more flexible and affordable.<sup>13, 16</sup> Some fathers in our study were disappointed with the absence of doctors in RHU. Health services should also be more friendly toward fathers; that is, they should be made parent-friendly instead of only mother-friendly.<sup>55</sup> In over 90 percent of cases, one reason for



**FATHERS' PERSPECTIVES ON CHILDHOOD PNEUMONIA**

1  
2  
3  
4 eventually visiting health facilities was the worsening of the child's condition.<sup>13</sup> If health facilities  
5  
6 become more reliable by ensuring the continuous presence of healthcare staff, particularly doctors,  
7  
8 and the constant availability of free medication, caregivers may prefer to directly take their children to  
9  
10 health facilities such as RHU.  
11  
12  
13

14  
15 This study, however, has some limitations. We were unable to distinguish fathers whose  
16  
17 children had been taken to RHU from those whose children had not been taken because of the  
18  
19 uncertainty of health records. Second, this study was conducted in just one rural municipality of the  
20  
21 Philippines, which is located in a remote island, and the interviews were conducted with only 12  
22  
23 fathers. Third, though we adhered to the COREQ guidelines,<sup>56</sup> we could not re-evaluate the returned  
24  
25 transcripts or check on participants because it was difficult to contact the participants again. However,  
26  
27 we tried to summarize the findings with each participant at the end of the interviews and confirmed  
28  
29 reliability. Fourth, the study was conducted in two languages, English and the local language. Although  
30  
31 we made every effort to ensure an accurate interpretation, the possibility of inaccurate interpretation  
32  
33 and/or translation cannot be entirely eliminated. However, we believe that this study provides some  
34  
35 important insights into fathers' perceptions and healthcare seeking behaviours related to childhood  
36  
37 pneumonia. Further studies should include other settings, utilize both qualitative and quantitative  
38  
39 methods to analyse health seeking patterns, and conduct a comparison of the roles of mothers and  
40  
41 fathers.  
42  
43  
44  
45  
46  
47  
48  
49  
50  
51  
52

**CONCLUSION**

**FATHERS' PERSPECTIVES ON CHILDHOOD PNEUMONIA**

1  
2  
3  
4 Fathers in our study tended to take responsibility for caring for their sick children and made  
5  
6 treatment decisions when their children had pneumonia-like episodes. They usually waited and  
7  
8 observed their sick children at home or relied on traditional healers before using formal health  
9  
10 facilities. Arranging money for the treatment of their sick children was their major role. Regarding  
11  
12 their role in deciding the treatment options, healthcare providers need to understand fathers' roles and  
13  
14 perspectives when formulating health education programs. It is crucial to consider cultural  
15  
16 background such as local beliefs. It is also imperative to address issues related to medical cost and the  
17  
18 credibility of health facilities to improve fathers' healthcare seeking behaviours.  
19  
20  
21  
22  
23  
24  
25

**Acknowledgements**

26  
27  
28  
29 The authors would like to acknowledge and thank the participants who generously shared  
30  
31 their time and experiences with us, as well as the supporting staff who provided assistance as  
32  
33 interpreters.  
34  
35  
36

**Contributorship statement**

37  
38  
39  
40 MS, ARN, and HO were involved in the conception and design of the study. MS and RT  
41  
42 carried out the acquisition of data. MS, NO, KS, and HO conducted data analysis and interpretation.  
43  
44  
45 JL, PPA, SL, and RT provided background information on the study site. VLT critically revised the  
46  
47 manuscript for important cultural and intellectual content. All authors read and approved the final  
48  
49 manuscript.  
50  
51  
52  
53

**Funding declaration**

**FATHERS' PERSPECTIVES ON CHILDHOOD PNEUMONIA**

This study was conducted with financial support from The Konosuke Matsushita Memorial Foundation, JSPS KAKENHI Grant Number17K09189, Science and Technology Research Partnership for Sustainable Development (SATREPS) from the Japan Agency for Medical Research and Development (AMED) and the Japan International Cooperation Agency (JICA) under Grant Number JP16jm0110001, and Tohoku University Center for Gender Equality Promotion. The funding authorities had no role in the study design, data collection and analysis, decision to publish, or preparation of the manuscript.

**Competing interests**

None declared.

**Patient consent**

Not required.

**Ethics approval**

The Ethics Committee of Tohoku University Graduate School of Medicine (No. 2014-1-790) and the Institutional Review Board of RITM in the Philippines (No. 2016-25) approved this study.

**Data sharing statement**

Anonymized interview transcripts can be made available from the corresponding author on reasonable request.

**Provenance and peer review**

Not commissioned; externally peer reviewed.

## FATHERS' PERSPECTIVES ON CHILDHOOD PNEUMONIA

1. You D, Hug L, Ejdemyr S, et al. Global, regional, and national levels and trends in under-5 mortality between 1990 and 2015, with scenario-based projections to 2030: a systematic analysis by the UN Inter-agency Group for Child Mortality Estimation. *Lancet* 2015;386:2275-86.
2. World Bank. *Data World Bank country and lending groups*.  
<https://datahelpdesk.worldbank.org/knowledgebase/articles/906519-world-bank-country-and-lending-groups> (cited 20 Dec 2017).
3. The United Nations Children's Fund (UNICEF). *Maternal and newborn health country profiles the Philippines*. [https://www.unicef.org/philippines/MNH\\_Philippines\\_Country\\_Profile.pdf](https://www.unicef.org/philippines/MNH_Philippines_Country_Profile.pdf) (cited 20 Dec 2017).
4. Department of Health, Republic of the Philippines. *Leading causes of child mortality*. <http://www.doh.gov.ph/node/1488> (cited 20 Dec 2017).
5. World Health Organization. *Towards a grand convergence for child survival and health: a strategic review of options for the future building on lessons learnt from IMNCI Nov.2016*  
<http://apps.who.int/iris/bitstream/10665/251855/1/WHO-MCA-16.04-eng.pdf?ua=1> (cited 20 Dec 2017).
6. The United Nations Children's Fund (UNICEF) / World Health Organization. *Pneumonia: the forgotten killer of children 2006*.  
[http://apps.who.int/iris/bitstream/10665/43640/1/9280640489\\_eng.pdf](http://apps.who.int/iris/bitstream/10665/43640/1/9280640489_eng.pdf) (cited 20 Dec 2017).
7. Scott JA, Wonodi C, Moisi JC, et al. The definition of pneumonia, the assessment of severity,

**FATHERS' PERSPECTIVES ON CHILDHOOD PNEUMONIA**

and clinical standardization in the pneumonia etiology research for child health study. *Clin Infect Dis* 2012;54:109-16.

8. World Health Organization. *Integrated management of childhood illness Chart Booklet*. 2014. [http://apps.who.int/iris/bitstream/10665/104772/16/9789241506823\\_Chartbook\\_eng.pdf?ua=1](http://apps.who.int/iris/bitstream/10665/104772/16/9789241506823_Chartbook_eng.pdf?ua=1) (cited 20 Dec 2017).
9. Diaz T, George AS, Rao SR, et al. Healthcare seeking for diarrhoea, malaria and pneumonia among children in four poor rural districts in Sierra Leone in the context of free health care: results of a cross-sectional survey. *BMC Public Health* 2013;13:157.
10. Ndu IK, Ekwochi U, Osuorah CD, et al. Danger signs of childhood pneumonia: caregiver awareness and care seeking behavior in a developing country. *Int J Pediatr* 2015;2015:167261.
11. Kante AM, Gutierrez HR, Larsen AM, et al. Childhood illness prevalence and health seeking behavior patterns in rural Tanzania. *BMC public health* 2015;15:951.
12. Seidenberg PD, Hamer DH, Iyer H, et al. Impact of integrated community case management on health-seeking behavior in rural Zambia. *Am J Trop Med Hyg* 2012;87(5 Suppl):105-10.
13. Ukwaja KN, Talabi AA, Aina OB. Pre-hospital care seeking behaviour for childhood acute respiratory infections in south-western Nigeria. *Int Health* 2012;4(4):289-94.
14. Gelaw YA, Biks GA, Alene KA. Effect of residence on mothers' health care seeking behavior for common childhood illness in Northwest Ethiopia: a community based comparative cross-sectuibal study. *BMC Res Notes* 2014;7:705.

## FATHERS' PERSPECTIVES ON CHILDHOOD PNEUMONIA

- 1  
2  
3  
4 15. Abbey M, Chinbuah MA, Gyapong M, et al. Community perceptions and practices of  
5  
6 treatment seeking for childhood pneumonia: a mixed methods study in a rural district, Ghana. *BMC*  
7  
8 *Public Health* 2016;16(1):848.  
9  
10  
11  
12 16. Bakshi SS, McMahon S, George A, et al. The role of traditional treatment on health care  
13  
14 seeking by caregivers for sick children in Sierra Leone: results of a baseline survey. *Acta Trop*  
15  
16 2013;127(1):46-52.  
17  
18  
19  
20 17. Kallander K, Hildenwall H, Waiswa P, et al. Delayed care seeking for fatal pneumonia in  
21  
22 children aged under five years in Uganda: a case-series study. *Bull World Health Organ*  
23  
24 2008;86(5):332-8.  
25  
26  
27  
28  
29 18. D'Souza RM. Role of health-seeking behaviour in child mortality in the slums of Karachi,  
30  
31 Pakistan. *J Biosoc Sci* 2003;35(1):131-44.  
32  
33  
34  
35 19. Tupasi TE, Radhakrishna S, Co VM, et al. Bacillary disease and health seeking behavior  
36  
37 among Filipinos with symptoms of tuberculosis: implications for control. *Int J Tuberc Lung Dis*  
38  
39 2000;4(12):1126-32.  
40  
41  
42  
43 20. Noordam AC, Carvajal-Velez L, Sharkey AB, et al. Care seeking behaviour for children with  
44  
45 suspected pneumonia in countries in sub-Saharan Africa with high pneumonia mortality. *PLoS One*  
46  
47 2015;10(2):e0117919.  
48  
49  
50  
51 21. Geldsetzer P, Williams TC, Kirolos A, et al. The recognition of and care seeking behaviour  
52  
53 for childhood illness in developing countries: a systematic review. *PLoS One* 2014;9(4):e93427.  
54  
55  
56  
57  
58  
59  
60

## FATHERS' PERSPECTIVES ON CHILDHOOD PNEUMONIA

- 1  
2  
3  
4 22. Ajzen, I. and M. Fishbein. Questions raised by a reasoned action approach: comment on  
5  
6 Ogden (2003). *Health Psychol* 2004;23(4):431-4.  
7  
8  
9 23. Ajzen, I. The theory of planned behaviour is alive and well, and not ready to retire: a  
10  
11 commentary on Sniehotka, Priesseu, and Araujo-Soares. *Health Psychol Rev*  
12  
13 2015;9(2):131-7.  
14  
15  
16 24. Ajzen, I. The theory of planned behaviour: reactions and reflections. *Psychol Health*.  
17  
18 2011;26(9):1113-27.  
19  
20  
21 25. Ajzen, I. The theory of planned behavior. *Behav Hum Decis Process* 1991;50:179-211.  
22  
23  
24 26. Vaismoradi M, Turunen H, Bondas T. Content analysis and thematic analysis: Implications  
25  
26 for conducting a qualitative descriptive study. *Nurs Health Sci* 2013;15(3):398-405.  
27  
28  
29 27. Hsieh HF, Shannon SE. Three approaches to qualitative content analysis. *Qual health res*  
30  
31 2005;15(9):1277-88.  
32  
33  
34 28. Immy Holloway, Sephanie Wheeler. Qualitative research in nursing and health care. 3<sup>rd</sup> edn.  
35  
36 West Sussex UK: *A John Wiley & Sons, Ltd.*, publication, 2010.  
37  
38  
39 29. Republic of the Philippines, Philippines Statistics Authority. *Population of Region VIII -*  
40  
41 *Eastern Visayas (Based on the 2015 Census of Population)*. 2016.  
42  
43 <https://psa.gov.ph/content/population-region-viii-eastern-visayas-based-2015-census-population>  
44  
45 (cited 20 Dec 2017).  
46  
47  
48 30. Asian Institute of Management. *Overview of health sector reform in the Philippines and*  
49  
50  
51  
52  
53  
54  
55  
56  
57  
58  
59  
60

**FATHERS' PERSPECTIVES ON CHILDHOOD PNEUMONIA**

possible opportunities for public-private partnerships 2010.

[file:///C:/Users/marisato/Downloads/health%20sector%20reform.pdf%20\(1\).pdf](file:///C:/Users/marisato/Downloads/health%20sector%20reform.pdf%20(1).pdf) (cited 20 Dec 2017).

31. Schreiner M. *A simple poverty scorecard for the Philippines 2007*. *Philippine Journal of Development 2007*;XXXIV:2. <https://dirp3.pids.gov.ph/ris/pjd/pidspjd07-2poverty.pdf> (cited 20 Dec 2017).

32. Schreiner M. *Simple Poverty Scorecard Philippines 8 June 2014*.

[http://www.microfinance.com/English/Papers/Scoring\\_Poverty\\_Philippines\\_2009\\_EN.pdf](http://www.microfinance.com/English/Papers/Scoring_Poverty_Philippines_2009_EN.pdf)

(cited 20 Dec 2017).

33. Iganus R, Hill Z, Manzi F, et al. Roles and responsibilities in newborn care in four African sites. *Trop Med Int Health* 2015;20(10):1258-64.

34. Kosai H, Tamaki R, Saito M, et al. Incidence and Risk Factors of Childhood Pneumonia-Like Episodes in Biliran Island, Philippines--A Community-Based Study. *PLoS One* 2015;10(5):e0125009.

35. Deressa W, Ali A, Berhane Y. Household and socioeconomic factors associated with childhood febrile illnesses and treatment seeking behaviour in an area of epidemic malaria in rural Ethiopia. *Trans R Soc Trop Med Hyg* 2007;101(9):939-47.

36. Kozhimannil KB, Valera MR, Adams AS, et al. The population-level impacts of a national health insurance program and franchise midwife clinics on achievement of prenatal and delivery care standards in the Philippines. *Health Policy* 2009;92(1):55-64.



## FATHERS' PERSPECTIVES ON CHILDHOOD PNEUMONIA

- 1  
2  
3  
4 37. Obermann K, Jowett MR, Alcantara MO, et al. Social health insurance in a developing  
5  
6 country: the case of the Philippines. *Soc Sci Med* 2006;62(12):3177-85.  
7  
8  
9 38. Alvesson HM, Lindelow M, Khanthaphat B, et al. Coping with uncertainty during  
10  
11 healthcare-seeking in Lao PDR. *BMC Int Health Hum Rights* 2013;13:28.  
12  
13  
14 39. Philippine Herbal Medicine. *Ten (10) herbal medicines in the Philippines approved by the*  
15  
16 *Department of Health (DOH)*. [http://www.philippineherbalmedicine.org/doh\\_herbs.htm](http://www.philippineherbalmedicine.org/doh_herbs.htm) (cited 20 Dec  
17  
18 2017).  
19  
20  
21  
22 40. Philippines Herbal Medicine. *Oregano (Origanum vulgare)*.  
23  
24 <http://www.philippineherbalmedicine.org/oregano.htm> (cited 20 Dec 2017).  
25  
26  
27  
28 41. Kim SA, Capeding MR, Kilgore PE. Factors influencing healthcare utilization among  
29  
30 children with pneumonia in Muntinlupa City, the Philippines. *Southeast Asian J Trop Med Public*  
31  
32 *Health* 2014;45(3):727-35.  
33  
34  
35  
36 42. Morgan DJ, Okeke IN, Laxminarayan R, et al. Non-prescription antimicrobial use  
37  
38 worldwide: a systematic review. *Lancet Infect Dis* 2011;11(9):692-701.  
39  
40  
41  
42 43. Le TH, Ottosson E, Nguyen TK, et al. Drug use and self-medication among children with  
43  
44 respiratory illness or diarrhea in a rural district in Vietnam: a qualitative study. *J Multidiscip Healthc*  
45  
46 2011;4:329-36.  
47  
48  
49  
50 44. Kallander K, Tomson G, Nsungwa-Sabiiti J, et al. Community referral in home management  
51  
52 of malaria in western Uganda: a case series study. *BMC Int Health Hum Rights* 2006;6:2.  
53  
54  
55  
56  
57  
58  
59  
60

## FATHERS' PERSPECTIVES ON CHILDHOOD PNEUMONIA

- 1  
2  
3  
4 45. McNee A, Khan N, Dawson S, et al. Responding to cough: Boholano illness classification  
5  
6 and resort to care in response to childhood ARI. *Soc Sci Med* 1995;40(9):1279-89.  
7  
8  
9 46. Mirzaei K, Milanifar A, Asghari F. Patients' perspectives of the substitute decision maker:  
10  
11 who makes better decisions? *J Med Ethics* 2011;37(9):523-5.  
12  
13  
14 47. Franckel A, Lalou R. Health-seeking behaviour for childhood malaria: household dynamics  
15  
16 in rural Senegal. *J Biosoc Sci* 2009;41(1):1-19.  
17  
18  
19 48. Greene ME, Mehta M, Pulerwitz J, et al. "Involving Men in Reproductive Health:  
20  
21 Contributions to Development" 17-24.  
22  
23  
24 [https://www.faithtoactionnetwork.org/resources/pdf/Involving%20Men%20in%20Reproductive%20He](https://www.faithtoactionnetwork.org/resources/pdf/Involving%20Men%20in%20Reproductive%20Health-Contributions%20to%20Development.pdf)  
25  
26  
27  
28  
29  
30  
31  
32 49. Bedford KJ, Sharkey AB. Local barriers and solutions to improve care-seeking for  
33  
34 childhood pneumonia, diarrhoea and malaria in Kenya, Nigeria and Niger: a qualitative study. *PLoS*  
35  
36  
37  
38  
39  
40  
41 50. Deutscher M, Beneden CV, Burton D, et al. Putting surveillance data into context: the role of  
42  
43 health care utilization surveys in understanding population burden of pneumonia in developing  
44  
45 countries. *J Epidemiol Glob Health* 2012;2(2):73-81.  
46  
47  
48  
49 51. World Health Organization. *Pneumonia Fact sheet. 2016.*  
50  
51  
52  
53  
54  
55 52. Su D, Huang TT, Anthony R, et al. Parental perception of child bodyweight and health  
56  
57  
58  
59  
60

**FATHERS' PERSPECTIVES ON CHILDHOOD PNEUMONIA**

among Mexican-American children with acanthosis nigricans. *J Immigr Minor Health*

2014;16(5):874-81.

53. Phimmasane M, Douangmala S, Koffi P, et al. Factors affecting compliance with measles vaccination in Lao PDR. *Vaccine* 2010;28(41):6723-9.

54. Tallo, V. Piang, panuhot or the moon: the folk etiology of cough among Boholano mothers.

<http://citeseerx.ist.psu.edu/viewdoc/download?doi=10.1.1.489.2385&rep=rep1&type=pdf> (cited 20

Dec 2017).

55. Davis J, Vyankandondera J, Luchters S, et al. Male involvement in reproductive, maternal and child health: a qualitative study of policymaker and practitioner perspectives in the Pacific.

*Reprod Health* 2016;13(1):81.

56. Tong, A., Sainsbury, P., Craig, J. Consolidated criteria for reporting qualitative research (COREQ): a 32-item checklist for interviews and focus groups. *Int J Qual Health Care* 2007;19(6):349-57.

**FATHERS' PERSPECTIVES ON CHILDHOOD PNEUMONIA**

1  
2  
3  
4  
5  
6  
7  
8  
9  
10  
11  
12  
13  
14  
15  
16  
17  
18  
19  
20  
21  
22  
23  
24  
25  
26  
27  
28  
29  
30  
31  
32  
33  
34  
35  
36  
37  
38  
39  
40  
41  
42  
43  
44  
45  
46  
47  
48  
49  
50  
51  
52  
53  
54  
55  
56  
57  
58  
59  
60

Figure 1: Biliran Province in the Eastern Visayas Region of the Philippines

For peer review only

## FATHERS' PERSPECTIVES ON CHILDHOOD PNEUMONIA

1  
2  
3  
4  
5  
6  
7  
8  
9  
10  
11  
12  
13  
14  
15  
16  
17  
18  
19  
20  
21  
22  
23  
24  
25  
26  
27  
28  
29  
30  
31  
32  
33  
34  
35  
36  
37  
38  
39  
40  
41  
42  
43  
44  
45  
46  
47  
48  
49  
50  
51  
52  
53  
54  
55  
56  
57  
58  
59  
60

For peer review only

1  
2  
3  
4  
5  
6  
7  
8  
9  
10  
11  
12  
13  
14  
15  
16  
17  
18  
19  
20  
21  
22  
23  
24  
25  
26  
27  
28  
29  
30  
31  
32  
33  
34  
35  
36  
37  
38  
39  
40  
41  
42  
43  
44  
45  
46  
47  
48  
49  
50  
51  
52  
53  
54  
55  
56  
57  
58  
59  
60

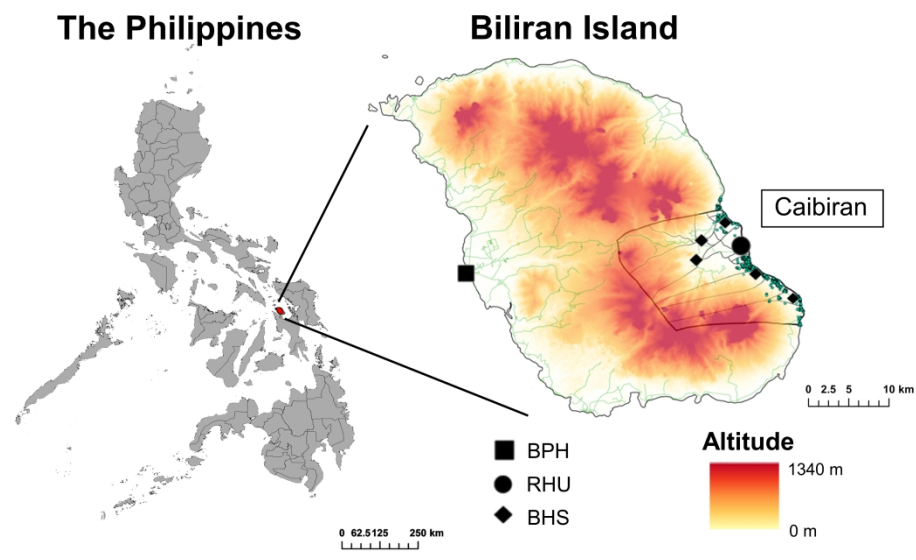

Figure 1: Biliran Province in the Eastern Visayas Region of the Philippines  
338x190mm (300 x 300 DPI)

Supplementary Appendix Table 1: Consolidated criteria for reporting qualitative studies (COREQ)  
32-item check-list

| Domain 1: Research team and reflexivity |                                                        |                                                                                                                                                                                                          |
|-----------------------------------------|--------------------------------------------------------|----------------------------------------------------------------------------------------------------------------------------------------------------------------------------------------------------------|
| Personal Characteristics                |                                                        |                                                                                                                                                                                                          |
| 1                                       | Interviewer/facilitator                                | The interviewer was the first author (MS) (p.10).                                                                                                                                                        |
| 2                                       | Credentials                                            | We wrote the credentials for all authors in the title page (p.1-2).                                                                                                                                      |
| 3                                       | Occupation                                             | We wrote the occupation for all authors in the title page (p.1-2).                                                                                                                                       |
| 4                                       | Gender                                                 | We did not write female or male in the manuscript, however, HO and RT are male and others are female.                                                                                                    |
| 5                                       | Experience and training relationship with participants | We explained the experience and training relationship with participants in p.10.                                                                                                                         |
| 6                                       | Relationship established                               | We wrote the relationship established in p.10.                                                                                                                                                           |
| 7                                       | Participant knowledge of the interviewer               | We wrote participant knowledge of the interviewer in p.11.                                                                                                                                               |
| 8                                       | Interview characteristics                              | We explained the interview characteristics in p.10.                                                                                                                                                      |
| Domain 2: study design                  |                                                        |                                                                                                                                                                                                          |
| Theoretical framework                   |                                                        |                                                                                                                                                                                                          |
| 9                                       | Methodological orientation and theory                  | We used the Theory of Planned Behaviour (p.7).                                                                                                                                                           |
| Participants selection                  |                                                        |                                                                                                                                                                                                          |
| 10                                      | Sampling                                               | We use the purposive sampling method (p. 9).                                                                                                                                                             |
| 11                                      | Method of approach                                     | We conducted a face-to-face interviews (p.10).                                                                                                                                                           |
| 12                                      | Sample size                                            | Original sample size (14) (p.9).                                                                                                                                                                         |
| 13                                      | Non-participation setting                              | Two participants were excluded since they were not available as one went away to work in the capital city of Manila and another was divorced and living apart with the child before the interview (p.9). |
| 14                                      | Setting of data collection                             | All interviews were conducted at the participants' house (p.10).                                                                                                                                         |
| 15                                      | Presence of non-participants                           | Sometimes, participants' small children interrupted the interview (p.10).                                                                                                                                |
| 16                                      | Description of sample data collection                  | We showed the important characteristics of the sample in Table 1 (p.13).                                                                                                                                 |
| 17                                      | Interview guide                                        | We wrote the interview questions in p.10.                                                                                                                                                                |
| 18                                      | Repeat interviews                                      | We conducted the interview once per a participant (p.11).                                                                                                                                                |

|                                |                                |                                                                                                                                                                                                                                                      |
|--------------------------------|--------------------------------|------------------------------------------------------------------------------------------------------------------------------------------------------------------------------------------------------------------------------------------------------|
| 19                             | Audio/visual recording         | The interviews were audio recorded (p.11).                                                                                                                                                                                                           |
| 20                             | Filed notes                    | The assistant interpreter recorded filed notes (p.10).                                                                                                                                                                                               |
| 21                             | Duration                       | The interviews lasted for 22-54min (p.11).                                                                                                                                                                                                           |
| 22                             | Data saturation                | We explained about the data saturation in p.11.                                                                                                                                                                                                      |
| 23                             | Transcripts returned           | We did not return the transcripts to participants. However, we tried to summarize the findings with each participant at the end of the interviews and confirmed reliability. We wrote about it in limitation.                                        |
| Domain3: analysis and findings |                                |                                                                                                                                                                                                                                                      |
| Data analysis                  |                                |                                                                                                                                                                                                                                                      |
| 24                             | Number of data codes           | Four researchers coded the data (p.11).                                                                                                                                                                                                              |
| 25                             | Description of the coding tree | We did not construct the coding tree, however, we showed themes and categories in table 2 and 3 (p.14 and 17).                                                                                                                                       |
| 26                             | Derivation of themes           | Themes were derived from the data.                                                                                                                                                                                                                   |
| 27                             | Software                       | We did not use any software for the analysis, Instead, we discussed during analyzing process through e-mail.                                                                                                                                         |
| 28                             | Participant checking reporting | We could not receive feedback on the finding. Reasons included; most participants were not at home most of time because of work, and we wrote it in the limitations.                                                                                 |
| Reporting                      |                                |                                                                                                                                                                                                                                                      |
| 29                             | Quotations presented           | Quotations presented in the results (p.14-20).                                                                                                                                                                                                       |
| 30                             | Data and findings consistent   | We have included the following sentence in the limitations. 'Second, this study was conducted in just one rural municipality of the Philippines which is located in a remote island, and the interviews were conducted with only 12 fathers' (p.25). |
| 31                             | Clarity of major themes        | We showed major themes in the results (p.14-20).                                                                                                                                                                                                     |
| 32                             | Clarity of minor themes        | We wrote categories in the results (p.14-20).                                                                                                                                                                                                        |



## Consolidated criteria for reporting qualitative studies (COREQ) 32-item check-list

| Domain 1: Research team and reflexivity |                                                        |                                                                                                                                                                                                          |
|-----------------------------------------|--------------------------------------------------------|----------------------------------------------------------------------------------------------------------------------------------------------------------------------------------------------------------|
| Personal Characteristics                |                                                        |                                                                                                                                                                                                          |
| 1                                       | Interviewer/facilitator                                | The interviewer was the first author (MS) (p.10).                                                                                                                                                        |
| 2                                       | Credentials                                            | We wrote the credentials for all authors in the title page (p.1-2).                                                                                                                                      |
| 3                                       | Occupation                                             | We wrote the occupation for all authors in the title page (p.1-2).                                                                                                                                       |
| 4                                       | Gender                                                 | We did not write female or male in the manuscript, however, HO and RT are male and others are female.                                                                                                    |
| 5                                       | Experience and training relationship with participants | We explained the experience and training relationship with participants in p.10.                                                                                                                         |
| 6                                       | Relationship established                               | We wrote the relationship established in p.10.                                                                                                                                                           |
| 7                                       | Participant knowledge of the interviewer               | We wrote participant knowledge of the interviewer in p.11.                                                                                                                                               |
| 8                                       | Interview characteristics                              | We explained the interview characteristics in p.10.                                                                                                                                                      |
| Domain 2: study design                  |                                                        |                                                                                                                                                                                                          |
| Theoretical framework                   |                                                        |                                                                                                                                                                                                          |
| 9                                       | Methodological orientation and theory                  | We used the Theory of Planned Behaviour (p.7).                                                                                                                                                           |
| Participants selection                  |                                                        |                                                                                                                                                                                                          |
| 10                                      | Sampling                                               | We use the purposive sampling method (p. 9).                                                                                                                                                             |
| 11                                      | Method of approach                                     | We conducted a face-to-face interviews (p.10).                                                                                                                                                           |
| 12                                      | Sample size                                            | Original sample size (14) (p.9).                                                                                                                                                                         |
| 13                                      | Non-participation setting                              | Two participants were excluded since they were not available as one went away to work in the capital city of Manila and another was divorced and living apart with the child before the interview (p.9). |
| 14                                      | Setting of data collection                             | All interviews were conducted at the participants' house (p.10).                                                                                                                                         |
| 15                                      | Presence of non-participants                           | Sometimes, participants' small children interrupted the interview (p.10).                                                                                                                                |
| 16                                      | Description of sample data collection                  | We showed the important characteristics of the sample in Table 1 (p.13).                                                                                                                                 |
| 17                                      | Interview guide                                        | We wrote the interview questions in p.10.                                                                                                                                                                |
| 18                                      | Repeat interviews                                      | We conducted the interview once per a participant (p.11).                                                                                                                                                |

|                                |                                |                                                                                                                                                                                                                                                      |
|--------------------------------|--------------------------------|------------------------------------------------------------------------------------------------------------------------------------------------------------------------------------------------------------------------------------------------------|
| 19                             | Audio/visual recording         | The interviews were audio recorded (p.11).                                                                                                                                                                                                           |
| 20                             | Filed notes                    | The assistant interpreter recorded filed notes (p.10).                                                                                                                                                                                               |
| 21                             | Duration                       | The interviews lasted for 22-54min (p.11).                                                                                                                                                                                                           |
| 22                             | Data saturation                | We explained about the data saturation in p.11.                                                                                                                                                                                                      |
| 23                             | Transcripts returned           | We did not return the transcripts to participants. However, we tried to summarize the findings with each participant at the end of the interviews and confirmed reliability. We wrote about it in limitation.                                        |
| Domain3: analysis and findings |                                |                                                                                                                                                                                                                                                      |
| Data analysis                  |                                |                                                                                                                                                                                                                                                      |
| 24                             | Number of data codes           | Four researchers coded the data (p.11).                                                                                                                                                                                                              |
| 25                             | Description of the coding tree | We did not construct the coding tree, however, we showed themes and categories in table 2 and 3 (p.14 and 17).                                                                                                                                       |
| 26                             | Derivation of themes           | Themes were derived from the data.                                                                                                                                                                                                                   |
| 27                             | Software                       | We did not use any software for the analysis, Instead, we discussed during analyzing process through e-mail.                                                                                                                                         |
| 28                             | Participant checking reporting | We could not receive feedback on the finding. Reasons included; most participants were not at home most of time because of work, and we wrote it in the limitations.                                                                                 |
| Reporting                      |                                |                                                                                                                                                                                                                                                      |
| 29                             | Quotations presented           | Quotations presented in the results (p.14-20).                                                                                                                                                                                                       |
| 30                             | Data and findings consistent   | We have included the following sentence in the limitations. 'Second, this study was conducted in just one rural municipality of the Philippines which is located in a remote island, and the interviews were conducted with only 12 fathers' (p.25). |
| 31                             | Clarity of major themes        | We showed major themes in the results (p.14-20).                                                                                                                                                                                                     |
| 32                             | Clarity of minor themes        | We wrote categories in the results (p.14-20).                                                                                                                                                                                                        |
