# Supplementary material for: Father’s roles and perspectives on healthcare seeking for children with pneumonia: findings of a qualitative study in a rural community of the Philippines
Source: PubMed Central journal article supplement — BMJ Open. 2018 Nov 21;8(11):e023857. doi: 10.1136/bmjopen-2018-023857 (PMC6252634; doi:10.1136/bmjopen-2018-023857), 2018-11-21
Supplement: bmjopen-2018-023857supp001.pdf [file bmjopen-2018-023857supp001.pdf]

Supplementary Appendix Table 1: Consolidated criteria for reporting qualitative studies (COREQ)  
32-item check-list

|                                         |                                                        |                                                                                                                                                                                                          |
|-----------------------------------------|--------------------------------------------------------|----------------------------------------------------------------------------------------------------------------------------------------------------------------------------------------------------------|
| Domain 1: Research team and reflexivity |                                                        |                                                                                                                                                                                                          |
| Personal Characteristics                |                                                        |                                                                                                                                                                                                          |
| 1                                       | Interviewer/facilitator                                | The interviewer was the first author (MS) (p.10).                                                                                                                                                        |
| 2                                       | Credentials                                            | We wrote the credentials for all authors in the title page (p.1-2).                                                                                                                                      |
| 3                                       | Occupation                                             | We wrote the occupation for all authors in the title page (p.1-2).                                                                                                                                       |
| 4                                       | Gender                                                 | We did not write female or male in the manuscript, however, HO and RT are male and others are female.                                                                                                    |
| 5                                       | Experience and training relationship with participants | We explained the experience and training relationship with participants in p.10.                                                                                                                         |
| 6                                       | Relationship established                               | We wrote the relationship established in p.10.                                                                                                                                                           |
| 7                                       | Participant knowledge of the interviewer               | We wrote participant knowledge of the interviewer in p.11.                                                                                                                                               |
| 8                                       | Interview characteristics                              | We explained the interview characteristics in p.10.                                                                                                                                                      |
| Domain 2: study design                  |                                                        |                                                                                                                                                                                                          |
| Theoretical framework                   |                                                        |                                                                                                                                                                                                          |
| 9                                       | Methodological orientation and theory                  | We used the Theory of Planned Behaviour (p.7).                                                                                                                                                           |
| Participants selection                  |                                                        |                                                                                                                                                                                                          |
| 10                                      | Sampling                                               | We use the purposive sampling method (p. 9).                                                                                                                                                             |
| 11                                      | Method of approach                                     | We conducted a face-to-face interviews (p.10).                                                                                                                                                           |
| 12                                      | Sample size                                            | Oriniginal sample size (14) (p.9).                                                                                                                                                                       |
| 13                                      | Non-participation setting                              | Two participants were excluded since they were not available as one went away to work in the capital city of Manila and another was divorced and living apart with the child before the interview (p.9). |
| 14                                      | Setting of data collection                             | All interviews were conducted at the participants' house (p.10).                                                                                                                                         |
| 15                                      | Presence of non-participants                           | Sometimes, participants' small children interrupted the interview (p.10).                                                                                                                                |
| 16                                      | Description of sample data collection                  | We showed the important characteristics of the sample in Table 1 (p.13).                                                                                                                                 |
| 17                                      | Interview guide                                        | We wrote the interview questions in p.10.                                                                                                                                                                |
| 18                                      | Repeat interviews                                      | We conducted the interview once per a participant (p.11).                                                                                                                                                |

|                                |                                |                                                                                                                                                                                                                                                      |
|--------------------------------|--------------------------------|------------------------------------------------------------------------------------------------------------------------------------------------------------------------------------------------------------------------------------------------------|
| 19                             | Audio/visual recording         | The interviews were audio recorded (p.11).                                                                                                                                                                                                           |
| 20                             | Filed notes                    | The assistant interpreter recorded filed notes (p.10).                                                                                                                                                                                               |
| 21                             | Duration                       | The interviews lasted for 22-54min (p.11).                                                                                                                                                                                                           |
| 22                             | Data saturation                | We explained about the data saturation in p.11.                                                                                                                                                                                                      |
| 23                             | Transcripts returned           | We did not return the transcripts to participants. However, we tried to summarize the findings with each participant at the end of the interviews and confirmed reliability. We wrote about it in limitation.                                        |
| Domain3: analysis and findings |                                |                                                                                                                                                                                                                                                      |
| Data analysis                  |                                |                                                                                                                                                                                                                                                      |
| 24                             | Number of data codes           | Four researchers coded the data (p.11).                                                                                                                                                                                                              |
| 25                             | Description of the coding tree | We did not construct the coding tree, however, we showed themes and categories in table 2 and 3 (p.14 and 17).                                                                                                                                       |
| 26                             | Derivation of themes           | Themes were derived from the data.                                                                                                                                                                                                                   |
| 27                             | Software                       | We did not use any software for the analysis, Instead, we discussed during analyzing process through e-mail.                                                                                                                                         |
| 28                             | Participant checking reporting | We could not receive feedback on the finding. Reasons included; most participants were not at home most of time because of work, and we wrote it in the limitations.                                                                                 |
| Reporting                      |                                |                                                                                                                                                                                                                                                      |
| 29                             | Quotations presented           | Quotations presented in the results (p.14-20).                                                                                                                                                                                                       |
| 30                             | Data and findings consistent   | We have included the following sentence in the limitations. ‘Second, this study was conducted in just one rural municipality of the Philippines which is located in a remote island, and the interviews were conducted with only 12 fathers’ (p.25). |
| 31                             | Clarity of major themes        | We showed major themes in the results (p.14-20).                                                                                                                                                                                                     |
| 32                             | Clarity of minor themes        | We wrote categories in the results (p.14-20).                                                                                                                                                                                                        |
